# Supplementary material for: Spatial dynamics of mammalian brain development and neuroinflammation by multimodal tri-omics mapping
Source: PubMed Central journal article supplement (PMC11291146; doi:10.1101/2024.07.28.605493), 2024-07-28
Supplement: media-1.pdf [file media-1.pdf]

1 **Spatial dynamics of mammalian brain development and**  
2 **neuroinflammation by multimodal tri-omics mapping**

3  
4 Di Zhang<sup>1,15</sup>, Leslie A Rubio Rodríguez-Kirby<sup>3,15</sup>, Yingxin Lin<sup>5</sup>, Mengyi Song<sup>6,7</sup>, Li Wang<sup>6,7</sup>,  
5 Lijun Wang<sup>5</sup>, Shigeaki Kanatani<sup>3</sup>, Tony Jimenez-Beristain<sup>3</sup>, Yonglong Dang<sup>3</sup>, Mei Zhong<sup>8</sup>,  
6 Petra Kukanja<sup>3</sup>, Shaohui Wang<sup>6,7</sup>, Xinyi Lisa Chen<sup>5</sup>, Fu Gao<sup>1</sup>, Dejiang Wang<sup>4,9</sup>, Hang  
7 Xu<sup>11</sup>, Xing Lou<sup>1</sup>, Yang Liu<sup>4,9</sup>, Jinmiao Chen<sup>10,11</sup>, Nenad Sestan<sup>12</sup>, Per Uhlén<sup>3</sup>, Arnold  
8 Kriegstein<sup>6,7</sup>, Hongyu Zhao<sup>5,13</sup>, Gonçalo Castelo-Branco<sup>3\*</sup>, & Rong Fan<sup>1,2,4,14\*</sup>

9  
10 <sup>1</sup>Department of Biomedical Engineering, Yale University, New Haven, CT 06520, USA

11 <sup>2</sup>Yale Stem Cell Center and Yale Cancer Center, Yale School of Medicine, New Haven, CT  
12 06520, USA

13 <sup>3</sup>Laboratory of Molecular Neurobiology, Department of Medical Biochemistry and  
14 Biophysics, Karolinska Institutet, Stockholm, Sweden

15 <sup>4</sup>Department of Pathology, Yale University School of Medicine, New Haven, CT, USA

16 <sup>5</sup>Department of Biostatistics, Yale School of Public Health, New Haven, CT 06510, USA

17 <sup>6</sup>The Eli and Edythe Broad Center of Regeneration Medicine and Stem Cell Research,  
18 University of California San Francisco; San Francisco, CA 94143, USA

19 <sup>7</sup>Department of Neurology, University of California San Francisco; San Francisco, CA  
20 94143, USA

21 <sup>8</sup>Yale Stem Cell Center and Department of Cell Biology, Yale University School of  
22 Medicine, New Haven, CT 06520, USA

23 <sup>9</sup>Department of Neurology, Yale School of Medicine, New Haven, CT, USA.

24 <sup>10</sup>Institute of Molecular and Cell Biology (IMCB), Agency for Science, Technology and  
25 Research (A\*STAR), Singapore, Singapore

26 <sup>11</sup>Bioinformatics Institute (BII), Agency for Science, Technology and Research (A\*STAR),  
27 Singapore, Singapore

28 <sup>12</sup>Department of Neuroscience, Yale School of Medicine, Yale University, New Haven, CT,  
29 USA

30 <sup>13</sup>Program of Computational Biology and Bioinformatics, Yale University, New Haven, CT,  
31 USA

32 <sup>14</sup>Human and Translational Immunology Program, Yale School of Medicine, New Haven, CT  
33 06520, USA

34 <sup>15</sup>These authors contributed equally.

35  
36 \*Corresponding authors. Email: [rong.fan@yale.edu](mailto:rong.fan@yale.edu) (R.F.), [goncalo.castelo-branco@ki.se](mailto:goncalo.castelo-branco@ki.se)  
37 (G.C.-B.)

|   |                                                                                       |
|---|---------------------------------------------------------------------------------------|
| 1 | <b>Table of Contents</b>                                                              |
| 2 | <b>3</b> Extended Data Figs. 1-25                                                     |
| 3 | <b>32</b> Extended Data Tables 1-6                                                    |
| 4 | <b>50</b> Extended Data Tables 7-8 (legends included, tables in separate Excel files) |
| 5 | <b>50</b> Extended Data Videos 1-3 (legends included, videos in separate .mp4 files)  |
| 6 |                                                                                       |

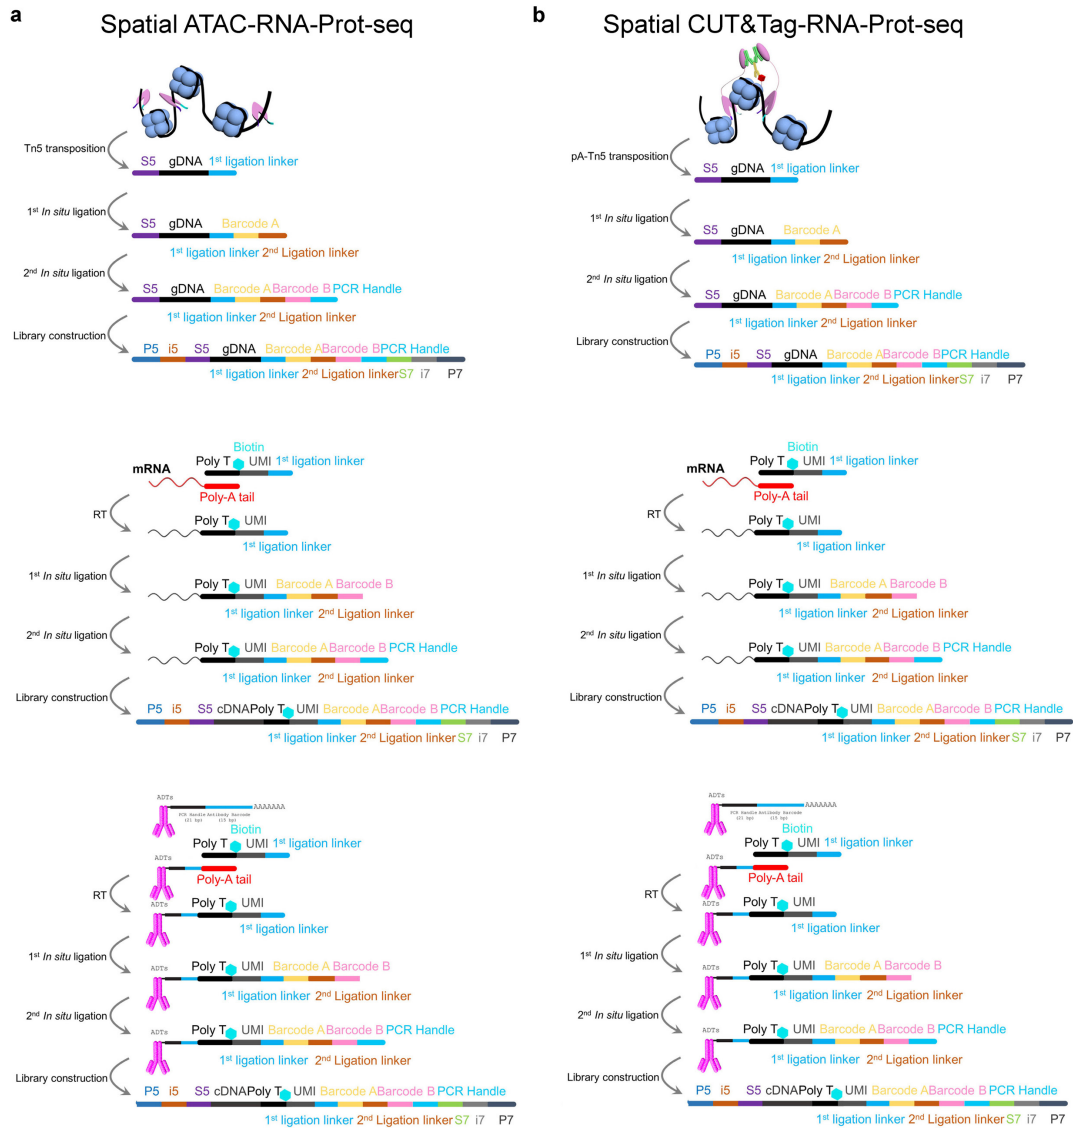

1  
2  
3  
4  
5  
6

**Extended Data Fig. 1 Workflow of spatial ATAC-RNA-Prot-seq (DBiT ARP-seq) and spatial CUT&Tag-RNA-Prot-seq (DBiT CTRP-seq).** **a**, Chemistry workflow of ATAC (top), RNA (middle), and protein (bottom) in DBiT ARP-seq. **b**, Chemistry workflow of CUT&Tag (top), RNA (middle), and protein (bottom) in DBiT CTRP-seq.

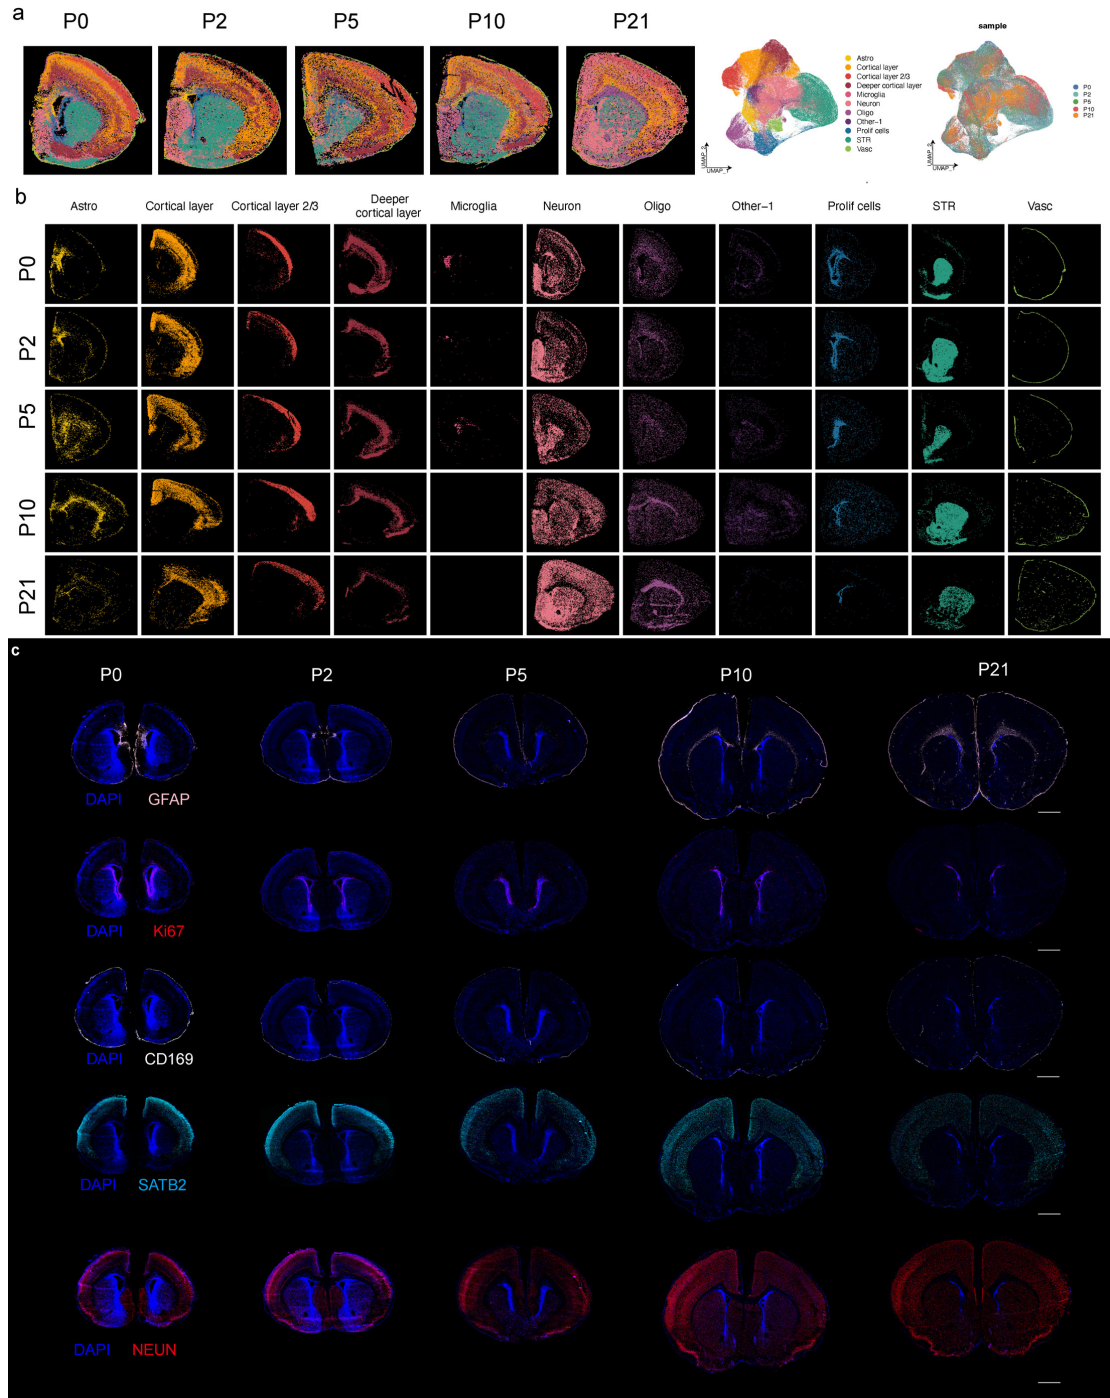

1  
2  
3  
4  
5  
6

**Extended Data Fig. 2 Further data analysis of CODEX images for postnatal mouse brains.**

**a**, Seurat clustering of the CODEX images in **Fig. 1b**. **b**, Spatial map of the cell types from **a**.  
**c**, CODEX images of GFAP, Ki67, CD169, and SATB2 for postnatal mouse brains. Scale bar, 1 mm.

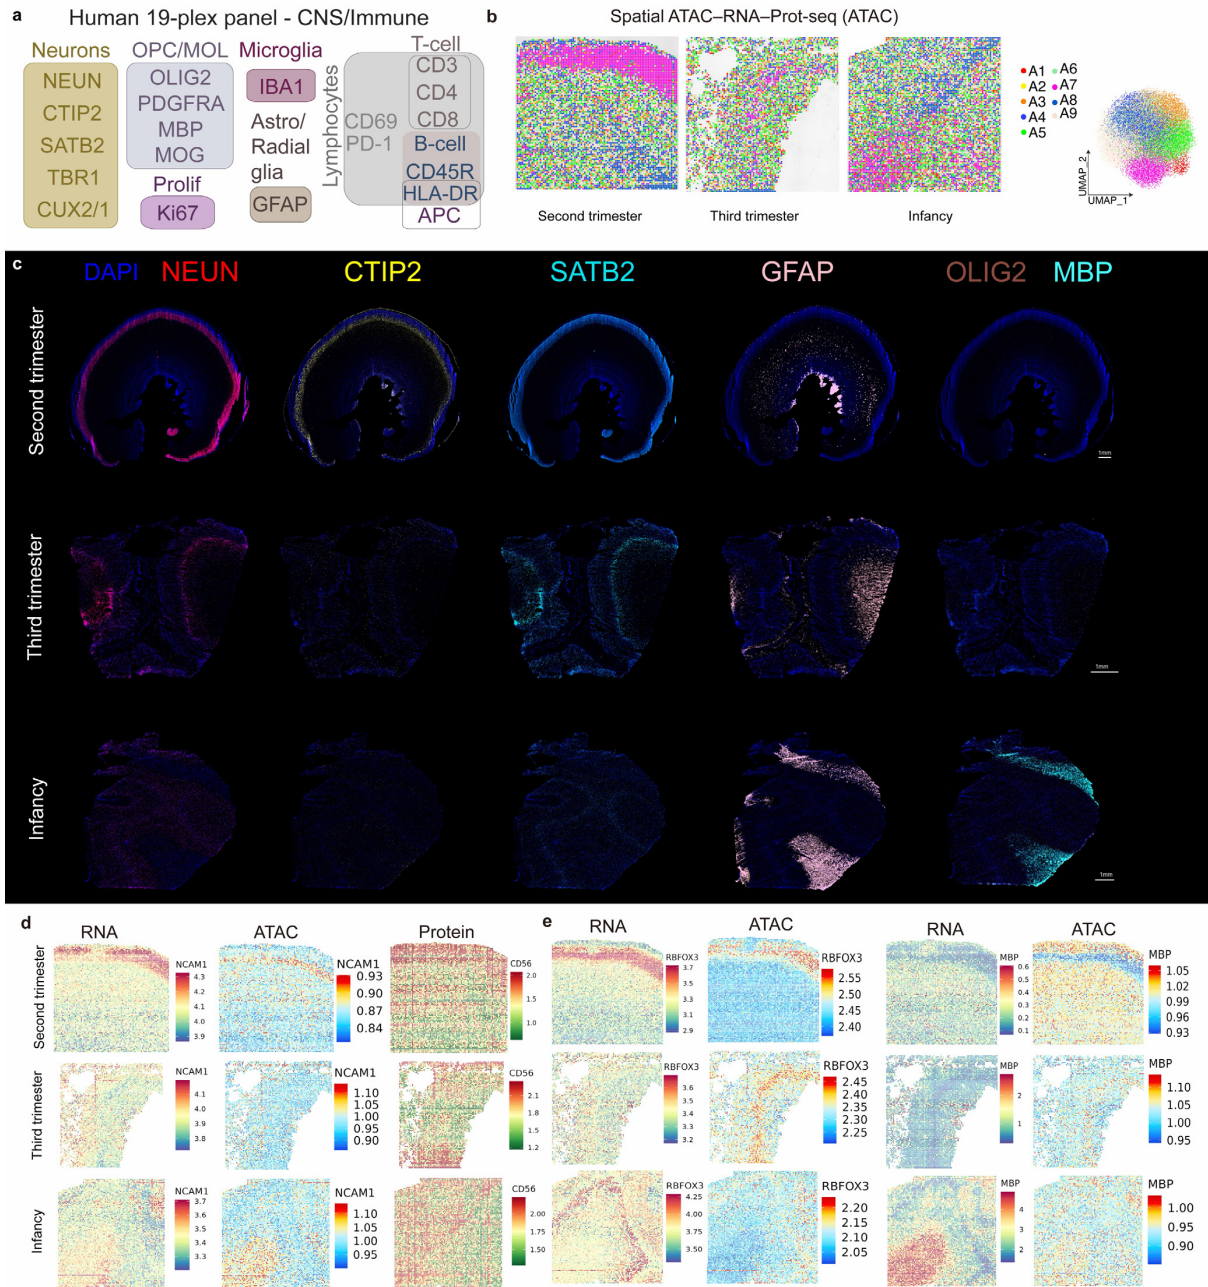

1  
2  
3  
4  
5  
6  
7  
8  
9

**Extended Data Fig. 3 Further data analysis of human brains in spatial ATAC–RNA–Prot-seq (DBiT ARP-seq).** **a**, CODEX protein panel for human. **b**, ATAC UMAP and spatial distribution of ATAC data of the human brain V1 regions at different stages. **c**, CODEX images of NEUN, CTIP2, SATB2, GFAP, OLIG2, and MBP for human brain V1 region at second trimester, third trimester, and infancy. Scale bar, 1 mm. **d**, Spatial mapping of gene expression, gene activity score (GAS), and ADT protein expression for *NCAMI*(CD56). **e**, Spatial mapping of gene expression and GAS for *RBFOX3* and *MBP*.

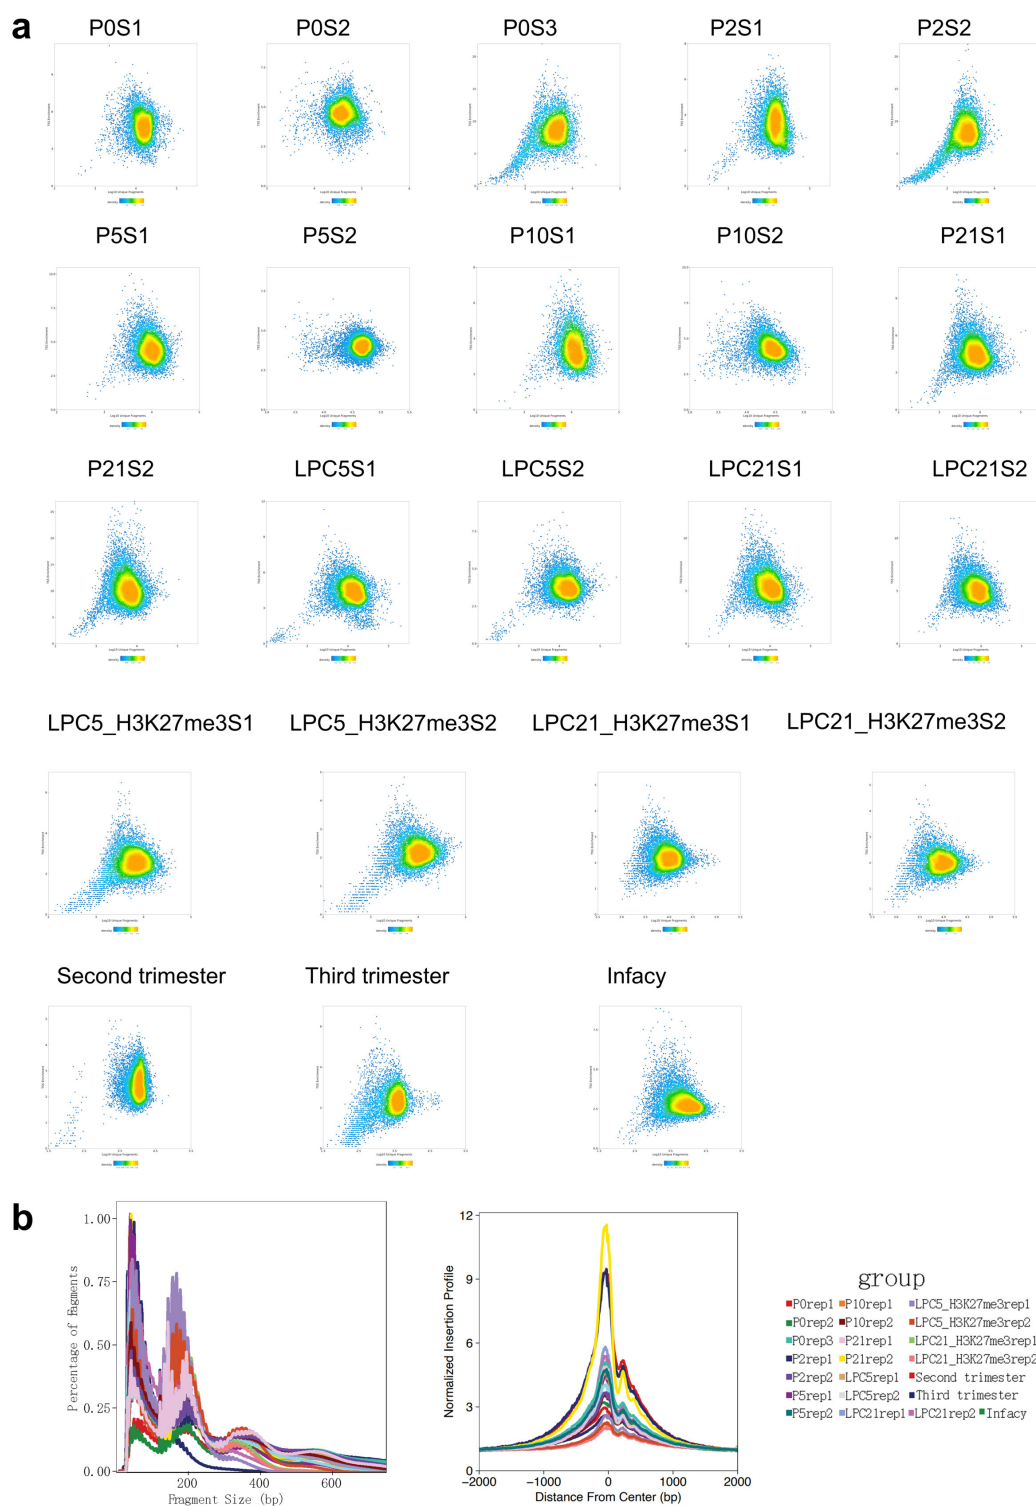

1

2 **Extended Data Fig. 4 Quality control metrics for DBiT ARP-seq and DBiT CTRP-seq**  
3 **datasets. a**, Scatterplots showing the TSS enrichment score vs unique nuclear fragments per  
4 pixel for all the samples finished. **b**, The insert size distribution of ATAC and CUT&Tag  
5 fragments (left) and the enrichment of ATAC or CUT&Tag reads around TSSs (right) in DBiT  
6 ARP-seq and DBiT CTRP-seq.

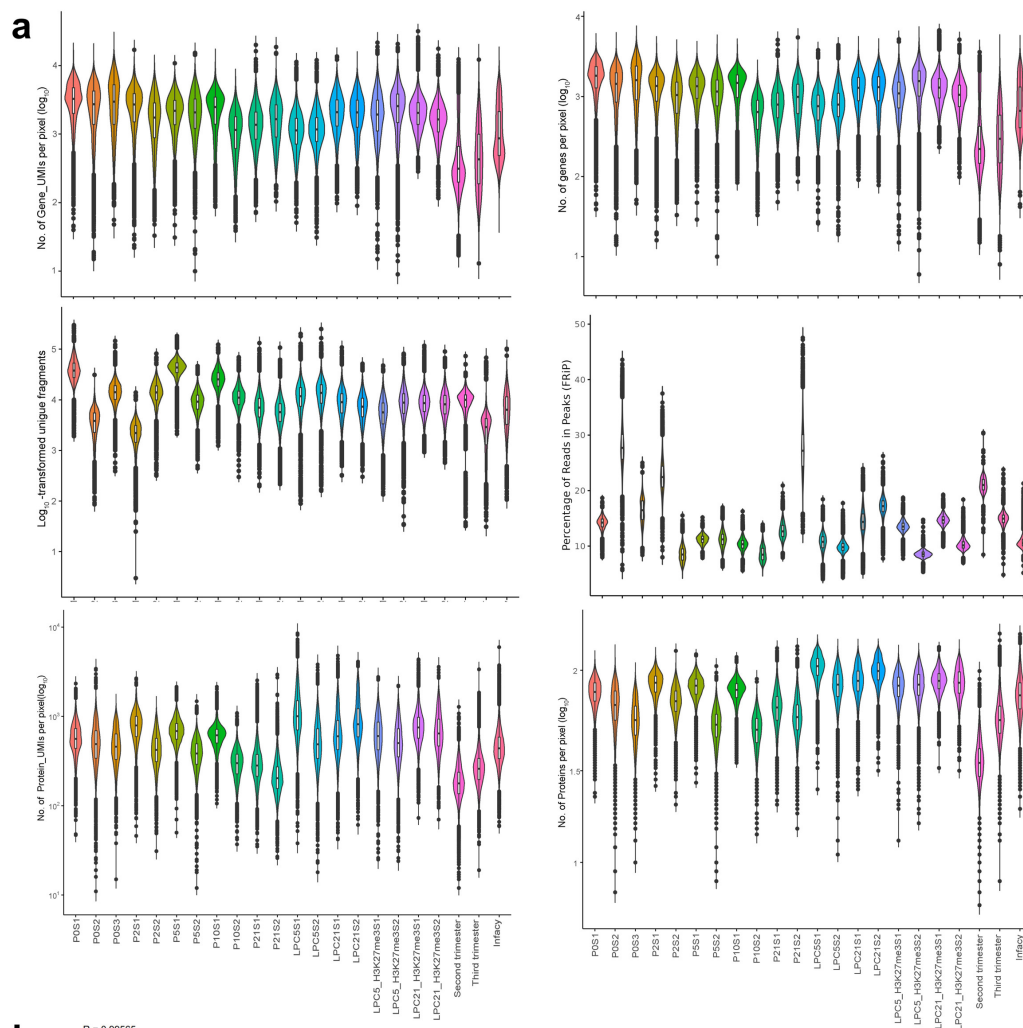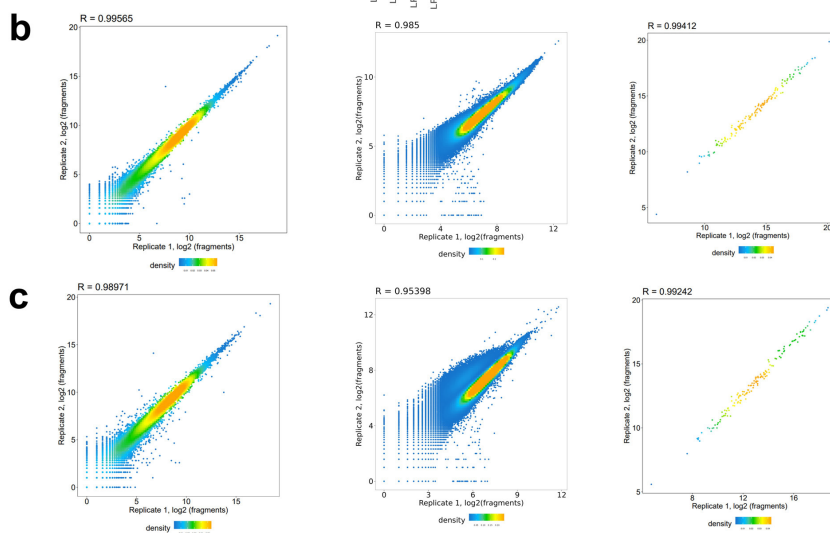

1

2 **Extended Data Fig. 5 Quality control metrics for DBiT ARP-seq and DBiT CTRP-seq**  
 3 **datasets. a,** Gene and UMI count distribution (upper), comparison of number of unique  
 4 fragments and fraction of reads in peaks (FRiP) (middle), ADT protein and UMI count (bottom)  
 5 of processed samples for DBiT ARP-seq and DBiT CTRP-seq (H3K27me3). The box plots  
 6 show the median (centre line), the first and third quartiles (box limits), and 1.5x the interquartile

1 range (whiskers). **b**, The reproducibility of DBiT ARP-seq between biological replicates on  
2 ATAC data (left), RNA data (middle), and ADT protein data (right) for 5DPL mouse brains. **c**,  
3 The reproducibility of DBiT CTRP-seq (H3K27me3) between biological replicates on  
4 CUT&Tag data (left), RNA data (middle), and ADT protein data (right) for 5DPL mouse brains.  
5



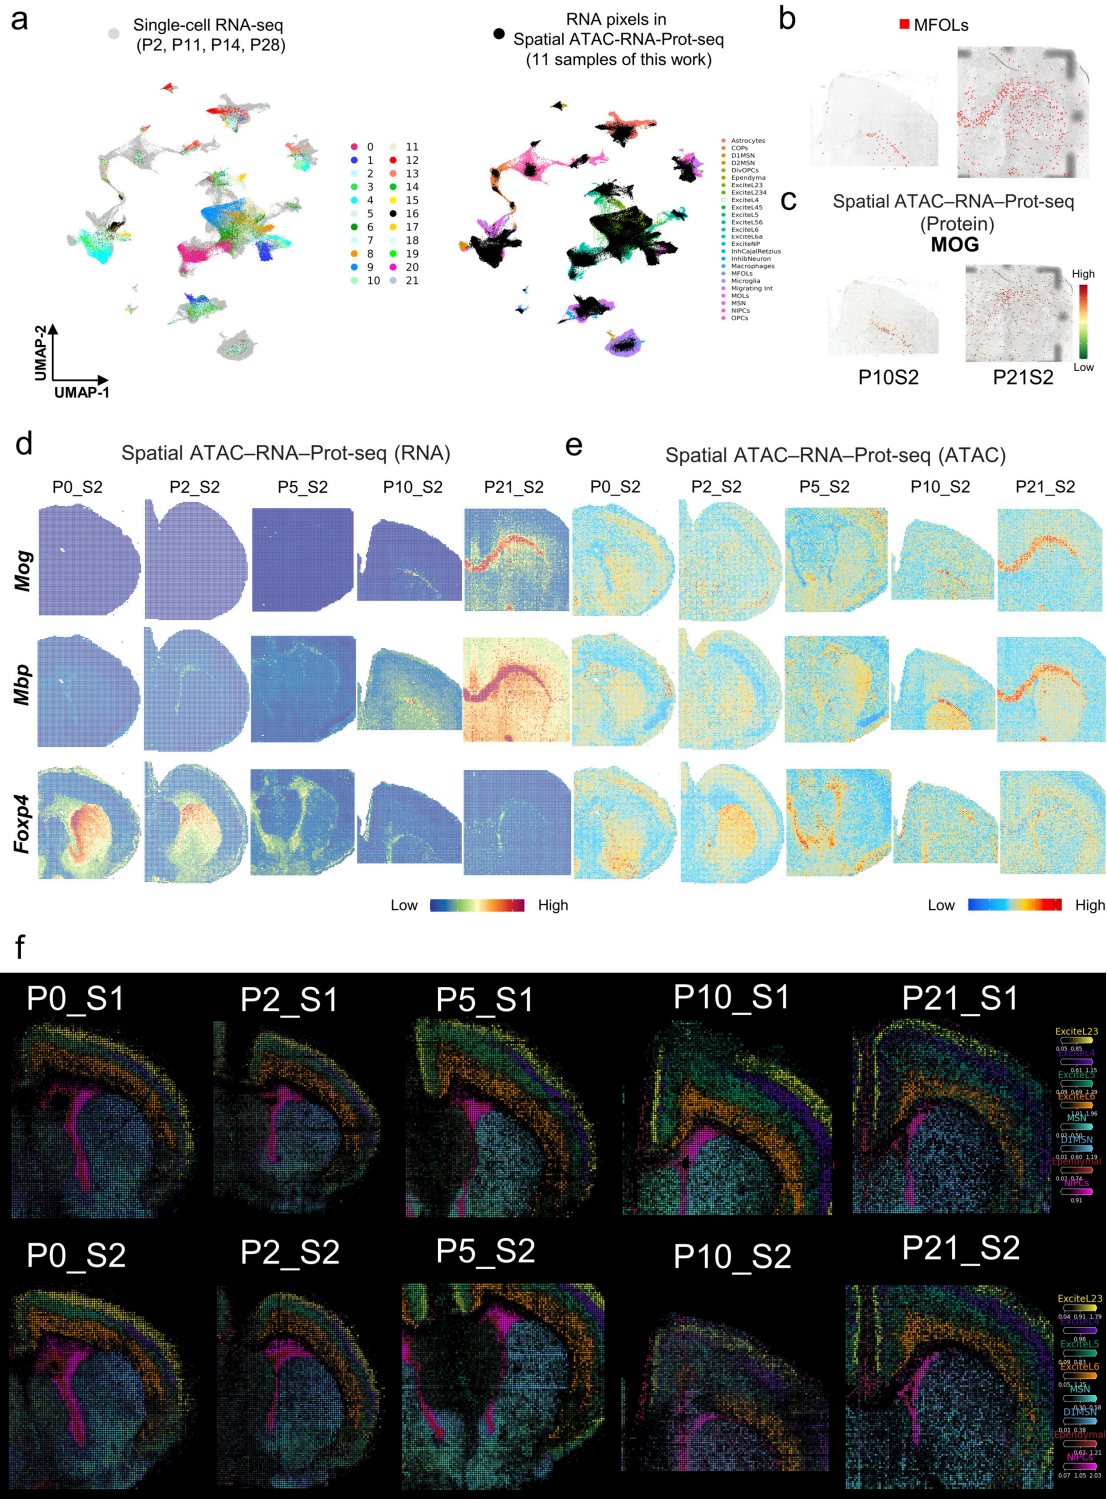

1  
2 **Extended Data Fig. 6 Further analysis of spatial ATAC-RNA-Prot-seq (DBiT ARP-seq)**  
3 **for postnatal mouse brains. a**, Integration of scRNA-seq data from P2, P11, P14, P28 mouse  
4 brains with our spatial RNA data in DBiT ARP-seq. **b**, Spatial mapping of MFOLs identified  
5 by label transfer from scRNA-seq to spatial RNA of P10 and P21 mouse brains. **c**, MOG  
6 expression in P10 and P21 mouse brain from the ADT protein data in DBiT ARP-seq. **d-e**,  
7 spatial mapping of gene expression (**d**) and GAS (**e**) for selected marker genes from replicates

- 1 in DBiT ARP-seq. **f**, Cell types predicted by cell2location from all processed postnatal mouse
- 2 brain samples.
- 3

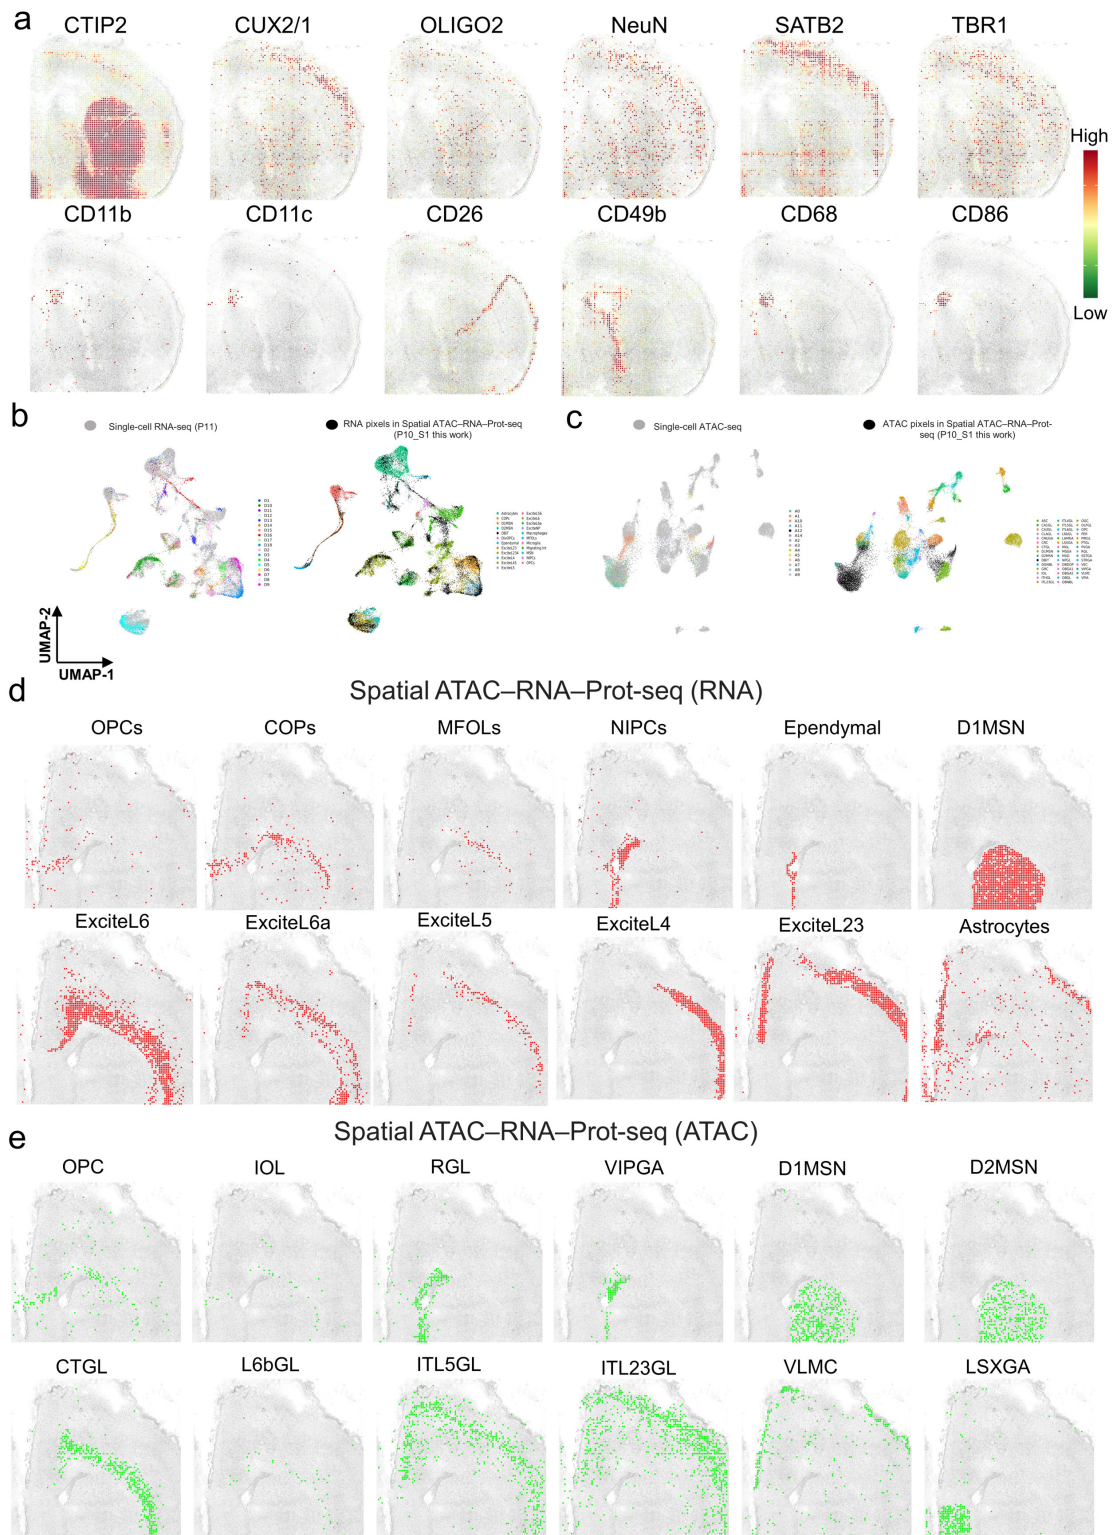

1

2 **Extended Data Fig. 7 Further analysis of spatial ATAC-RNA-Prot-seq (DBiT ARP-seq)**  
 3 **for postnatal mouse brains. a**, Expression of several ADT proteins in DBiT ARP-seq from P0.  
 4 **b**, Integration of P10 spatial RNA data and scRNA-seq data from mouse brain. **c**, Integration  
 5 of P10 spatial ATAC data and scATAC-seq data from mouse brain. **d**, Spatial mapping of cell  
 6 types identified by label transfer from scRNA-seq to P10 spatial RNA data. **e**, Spatial mapping

- 1 of cell types identified by label transfer from scATAC-seq to P10 spatial ATAC data.
- 2

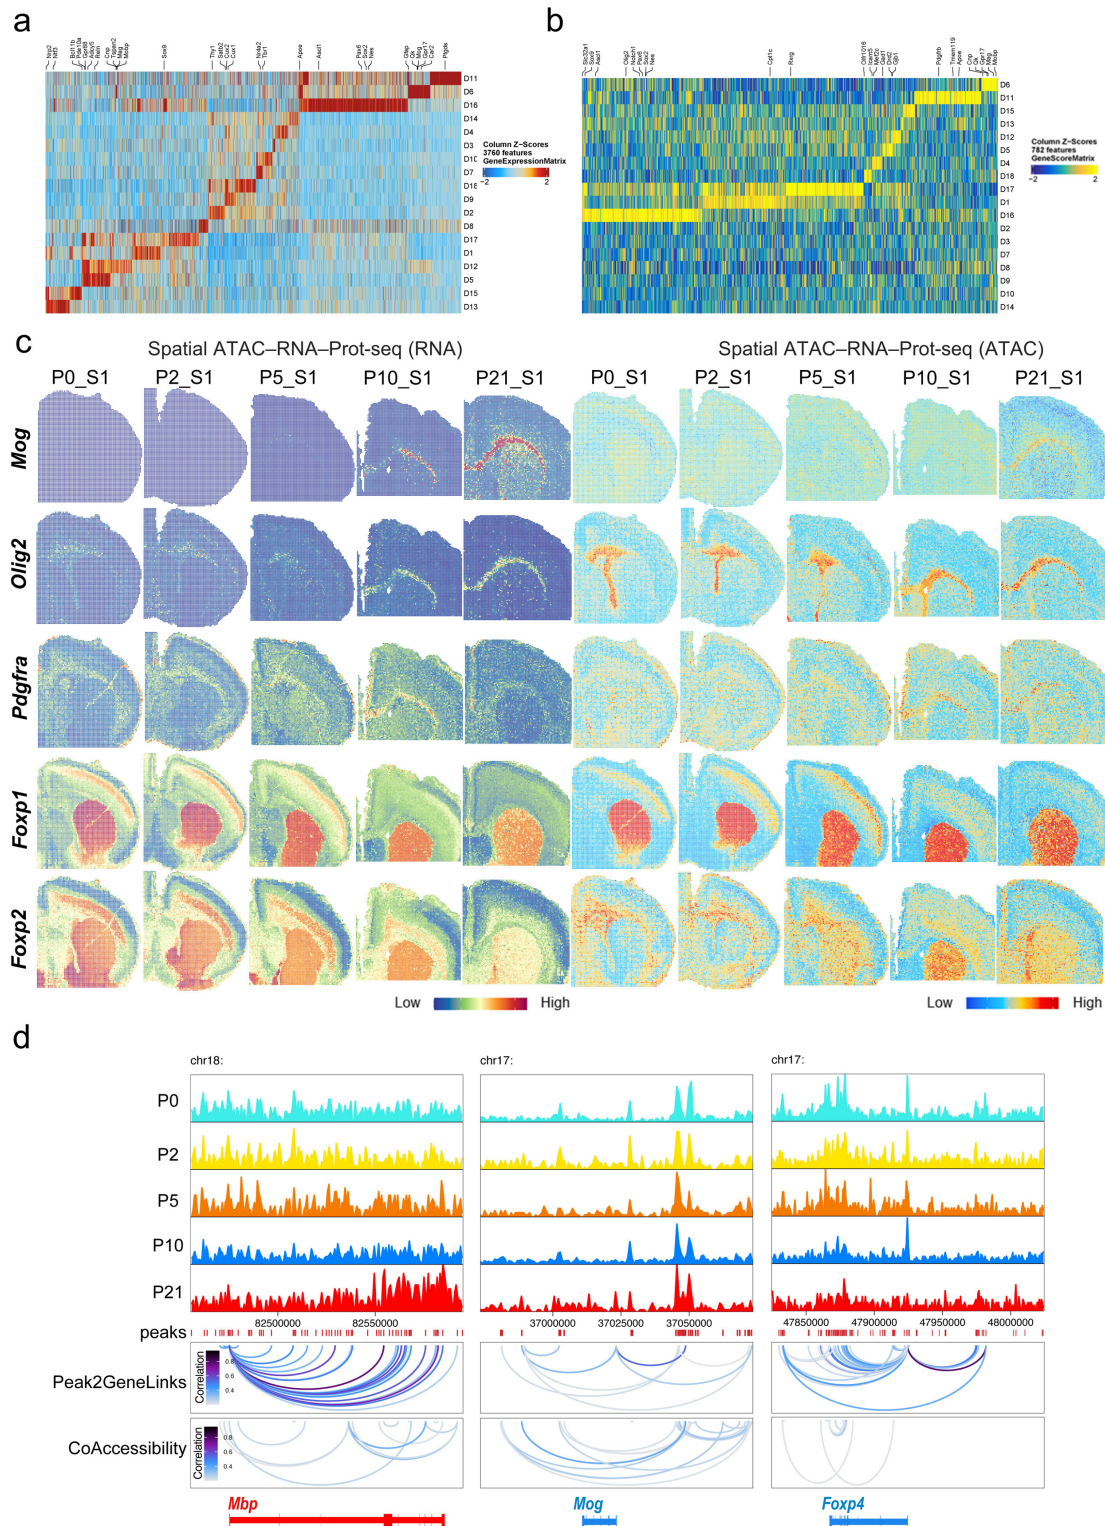

1  
 2 **Extended Data Fig. 8 Further analysis of spatial ATAC-RNA-Prot-seq (DBiT ARP-seq)**  
 3 **for postnatal mouse brains. a**, Marker gene expression in each spatial domain in **Fig. 1i. b**,  
 4 Marker GAS in each spatial domain in **Fig. 1i. c**, Spatial mapping of gene expression and GAS  
 5 for selected marker genes in different clusters for RNA and ATAC in DBiT ARP-seq. **d**,  
 6 Genome track visualization of marker genes with peak-to-gene links for distal regulatory

- 1 elements and peak co-accessibility.
- 2

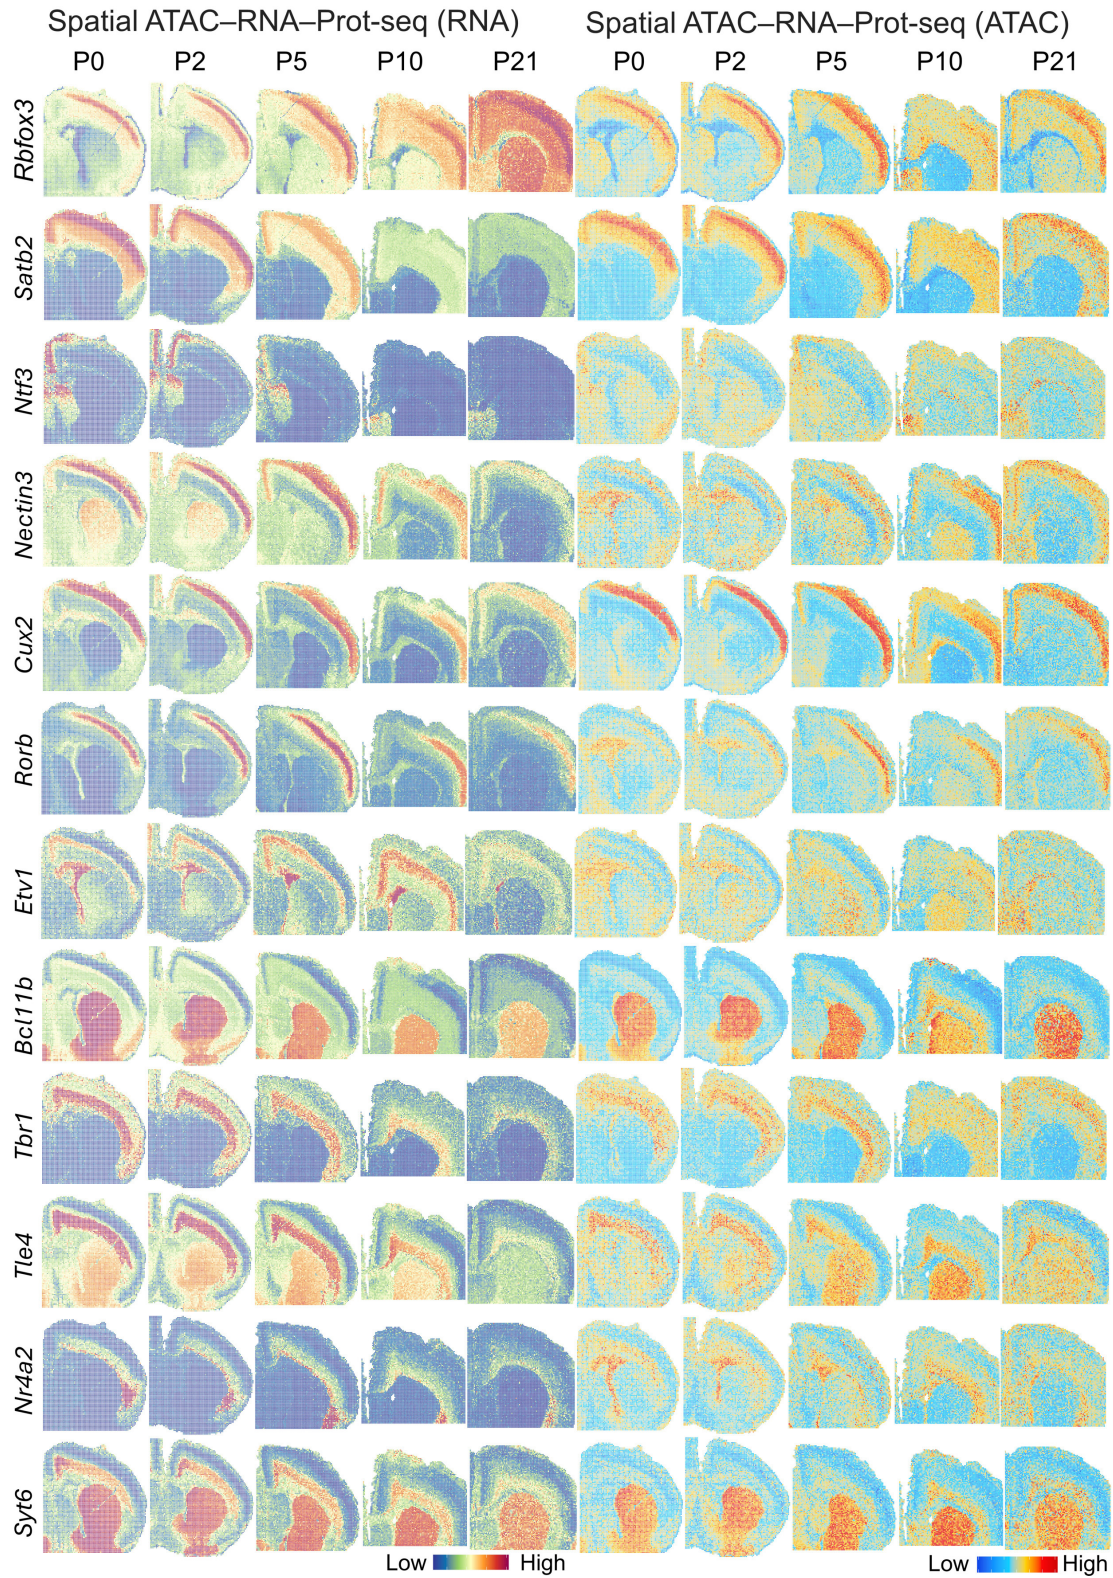

1  
2  
3  
4  
5

**Extended Data Fig. 9 Gene expression of cortical-layer specific markers for postnatal mouse brains.** Spatial mapping of gene expression and GAS for neuronal marker genes from RNA and ATAC in DBiT ARP-seq.

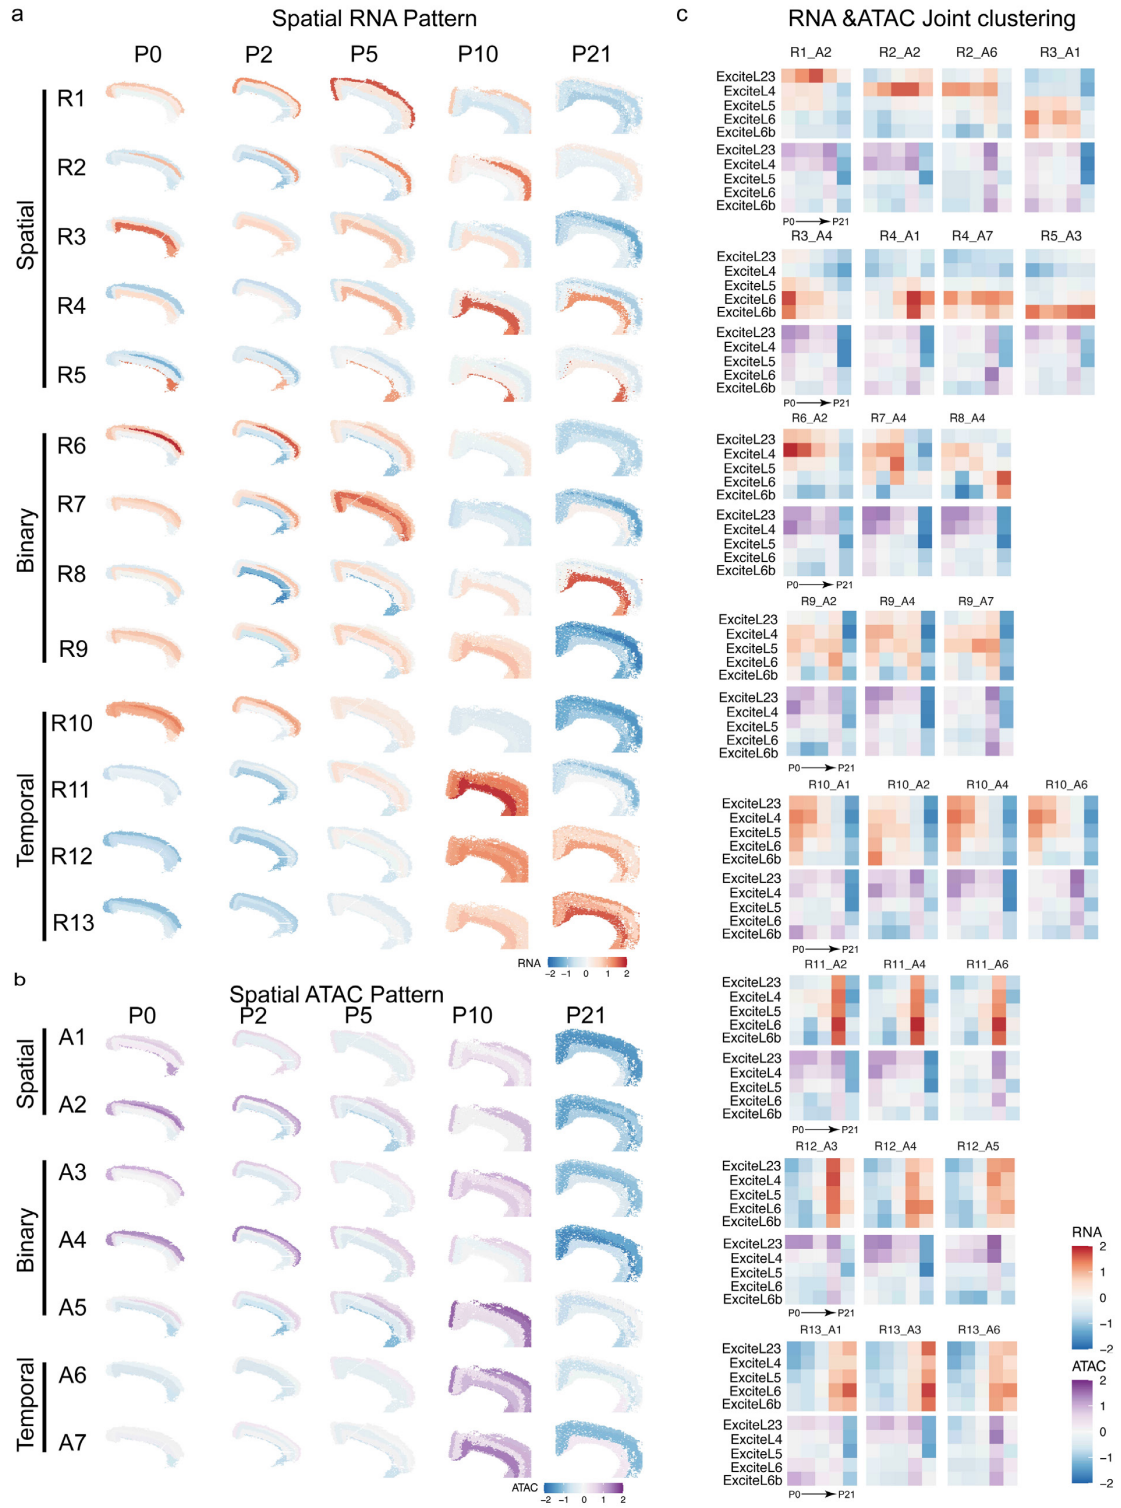

1

2 **Extended Data Fig. 10 Further analysis of developing mouse brain cortical layers. a-b,**  
3 **Spatial RNA (a) and ATAC (b) patterns generated from the regression model. c, Heatmap for**  
4 **each of the 27 clusters from the RNA & ATAC joint clustering analysis.**

5



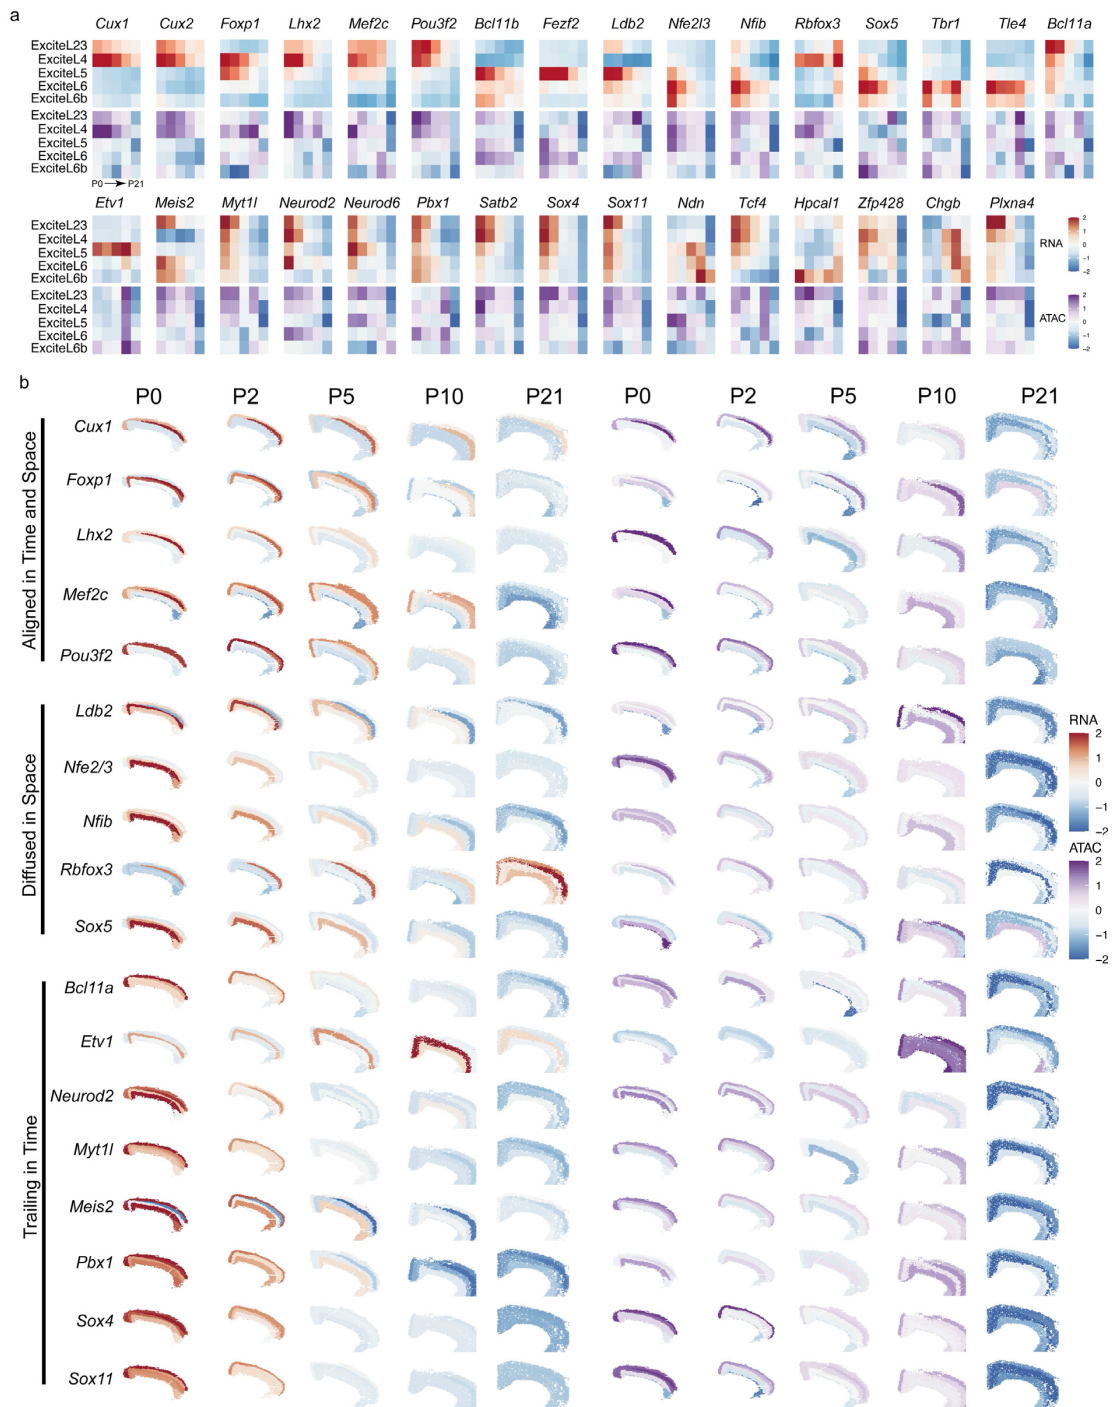

1  
 2 **Extended Data Fig. 11 Further analysis of developing mouse brain cortical layers. a,**  
 3 **Heatmaps of the RNA gene expression (top) and ATAC GAS (bottom) calculated on the basis**  
 4 **of the regression model for specific neuronal genes. b, The RNA gene expression and ATAC**  
 5 **GAS calculated on the basis of the regression model for specific neuronal genes.**  
 6

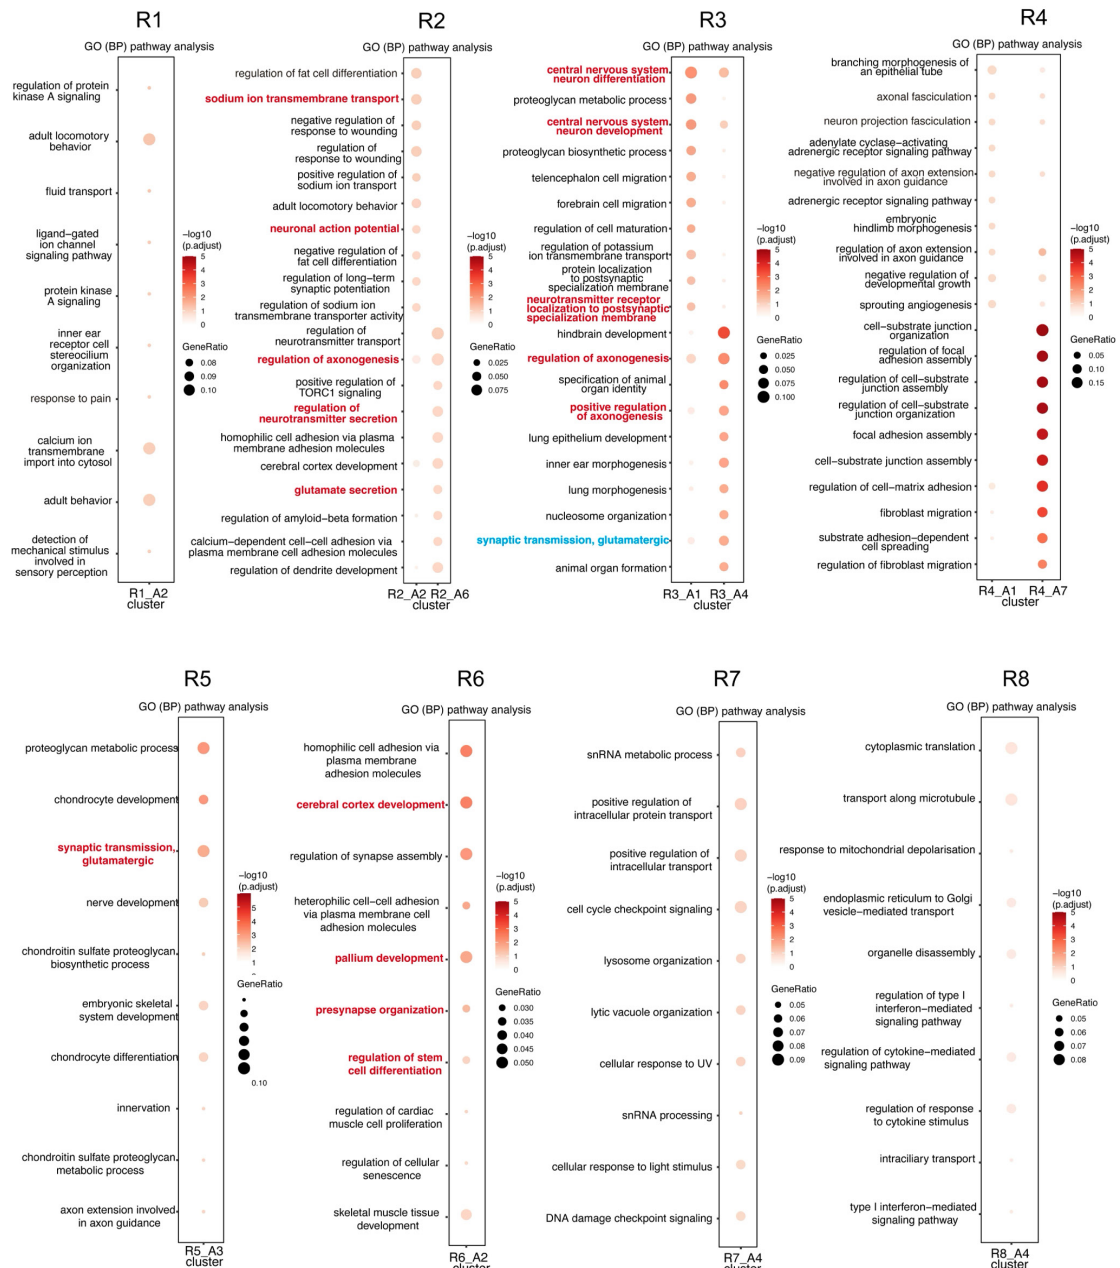

1  
2  
3  
4

**Extended Data Fig. 12 Further analysis of developing mouse brain cortical layers. GO analysis for each RNA cluster (R1-R8) generated from the regression model.**

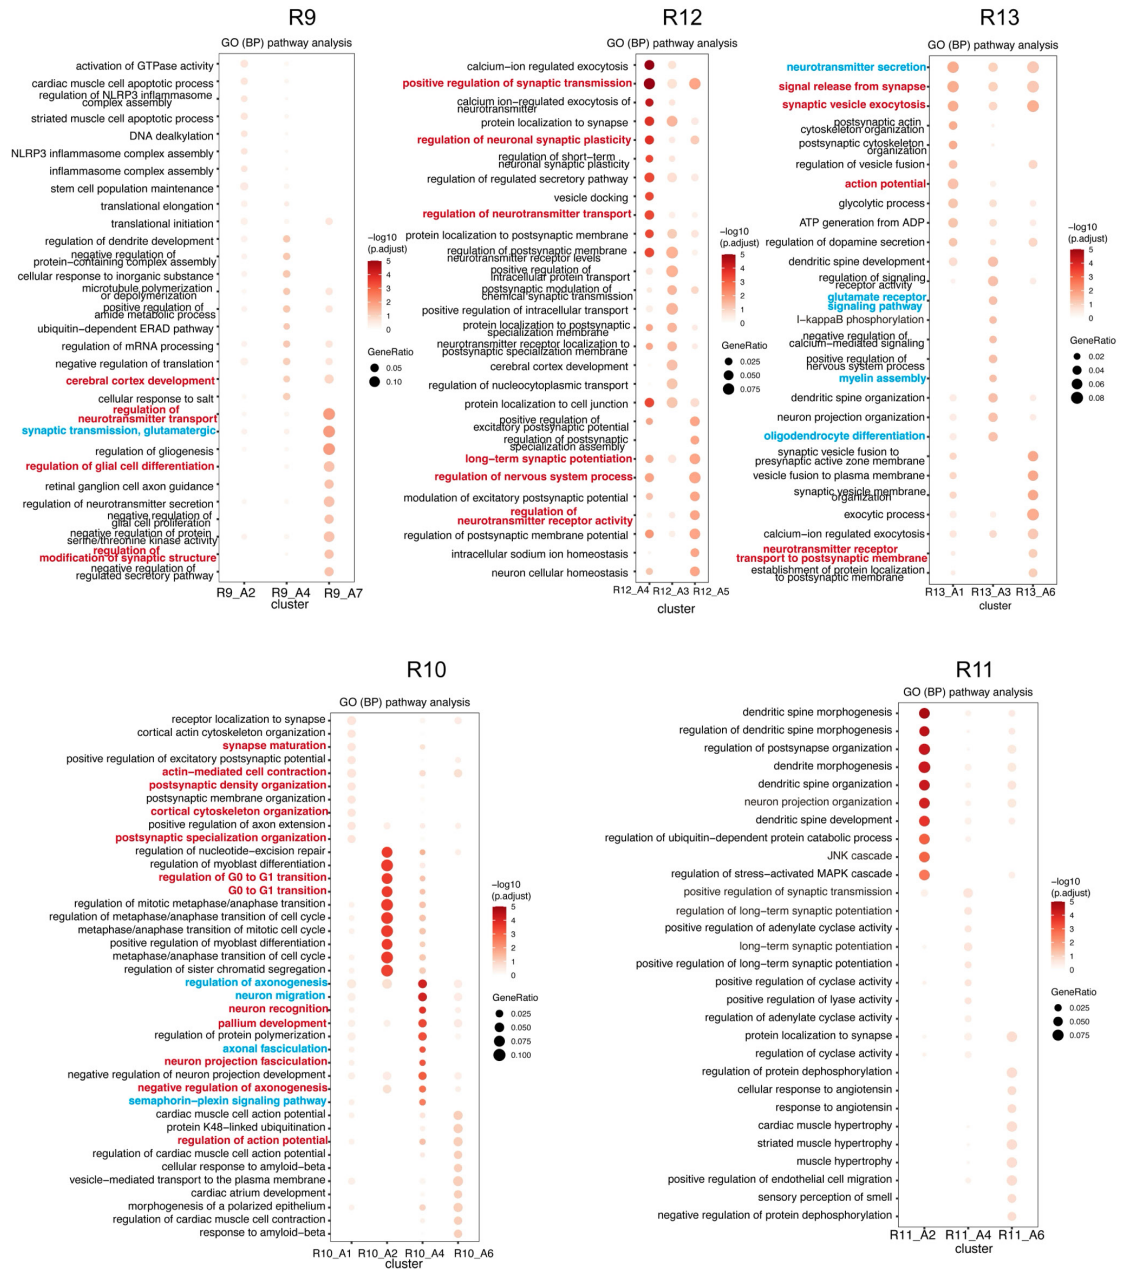

1  
2  
3  
4

**Extended Data Fig. 13 Further analysis of developing mouse brain cortical layers. GO analysis for each RNA cluster (R9-R13) generated from the regression model.**

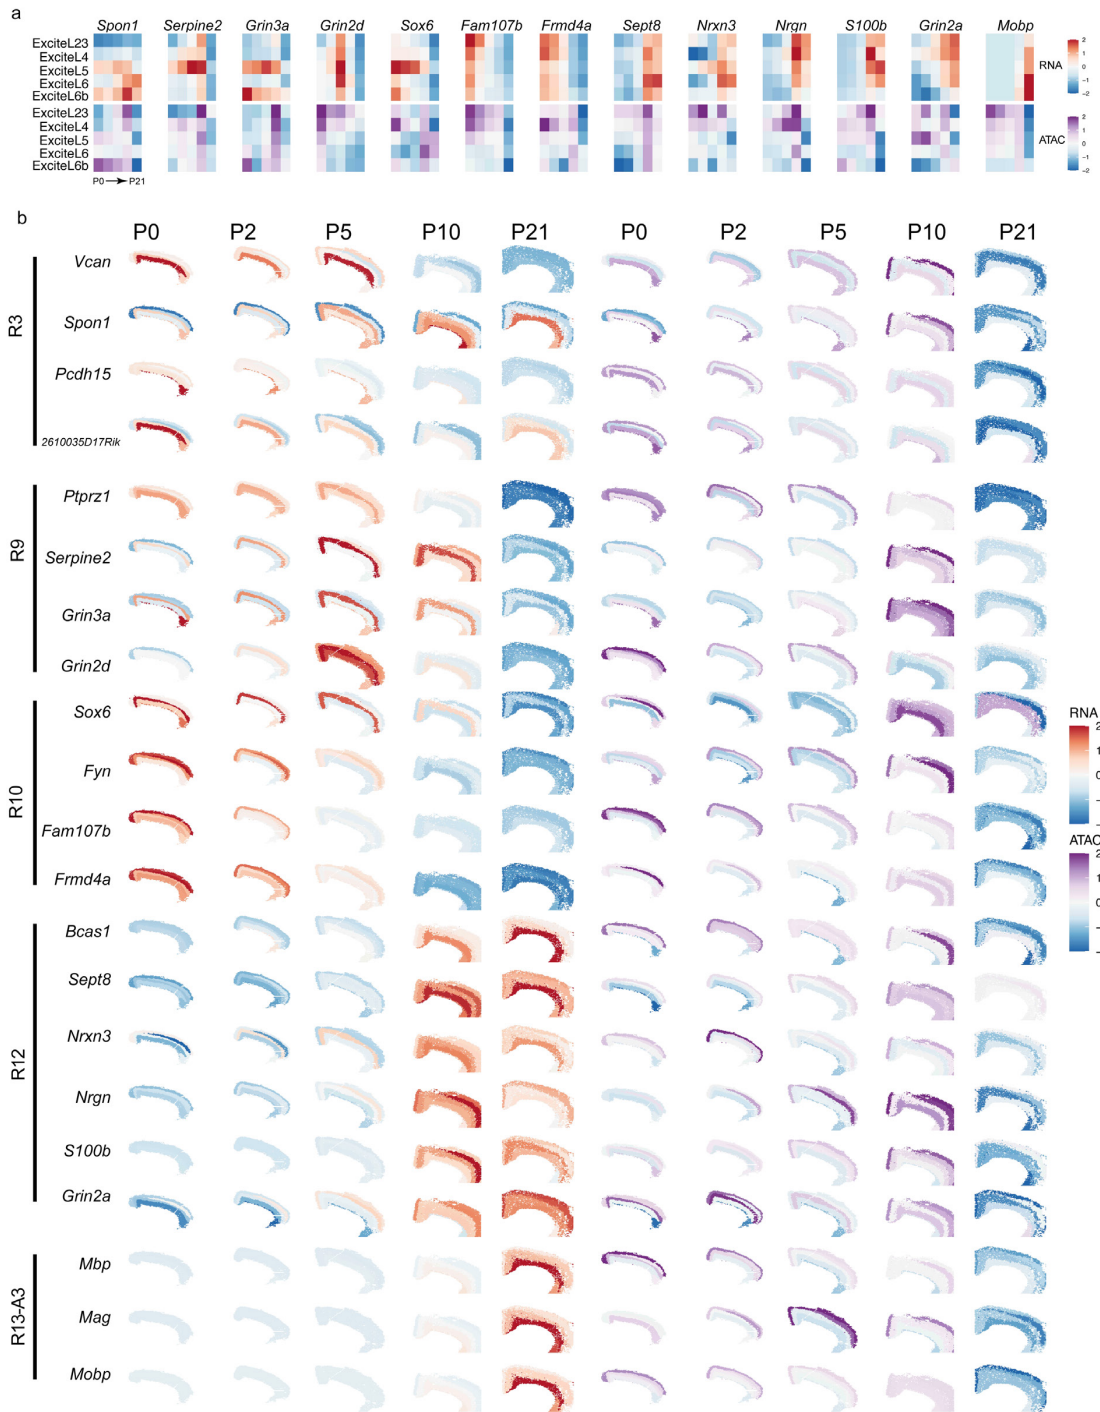

1  
2  
3  
4  
5  
6

**Extended Data Fig. 14 Further analysis of developing mouse brain cortical layers. a,** Heatmaps of the RNA gene expression (top) and ATAC GAS (bottom) calculated on the basis of the regression model for myelin related genes. **b,** The RNA gene expression and ATAC GAS calculated on the basis of the regression model for myelin related genes.

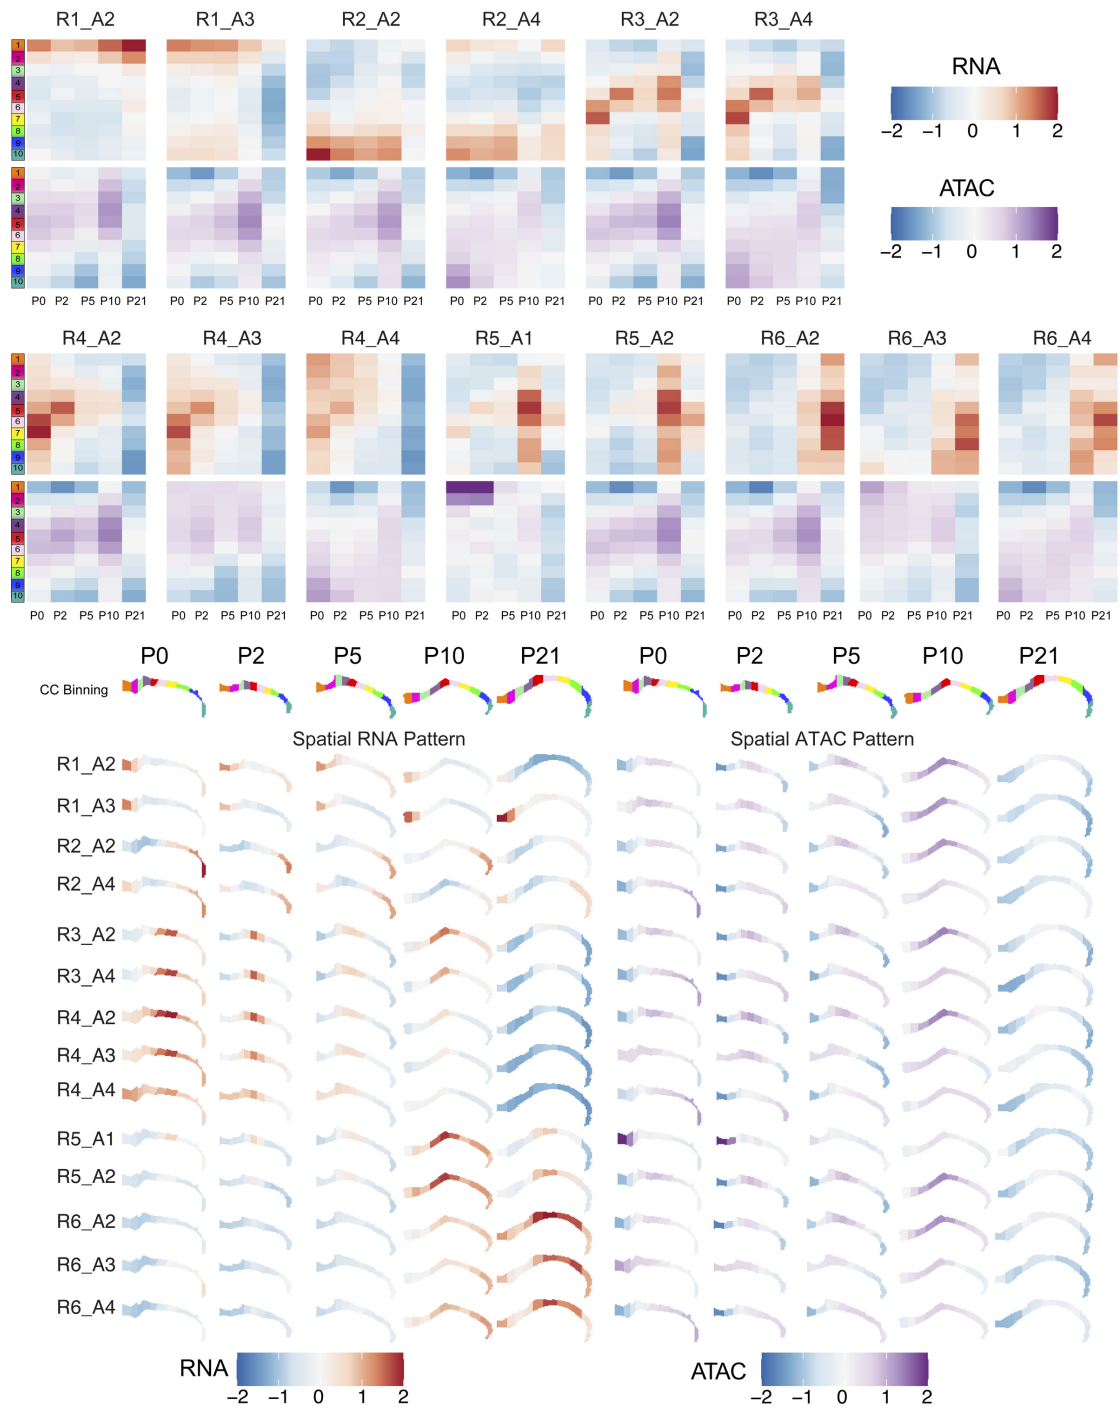

1  
2  
3  
4

**Extended Data Fig. 15 Further analysis of developing mouse brain corpus callosum.**  
Heatmaps and spatial patterns of the 14 RNA&ATAC joint clustering.

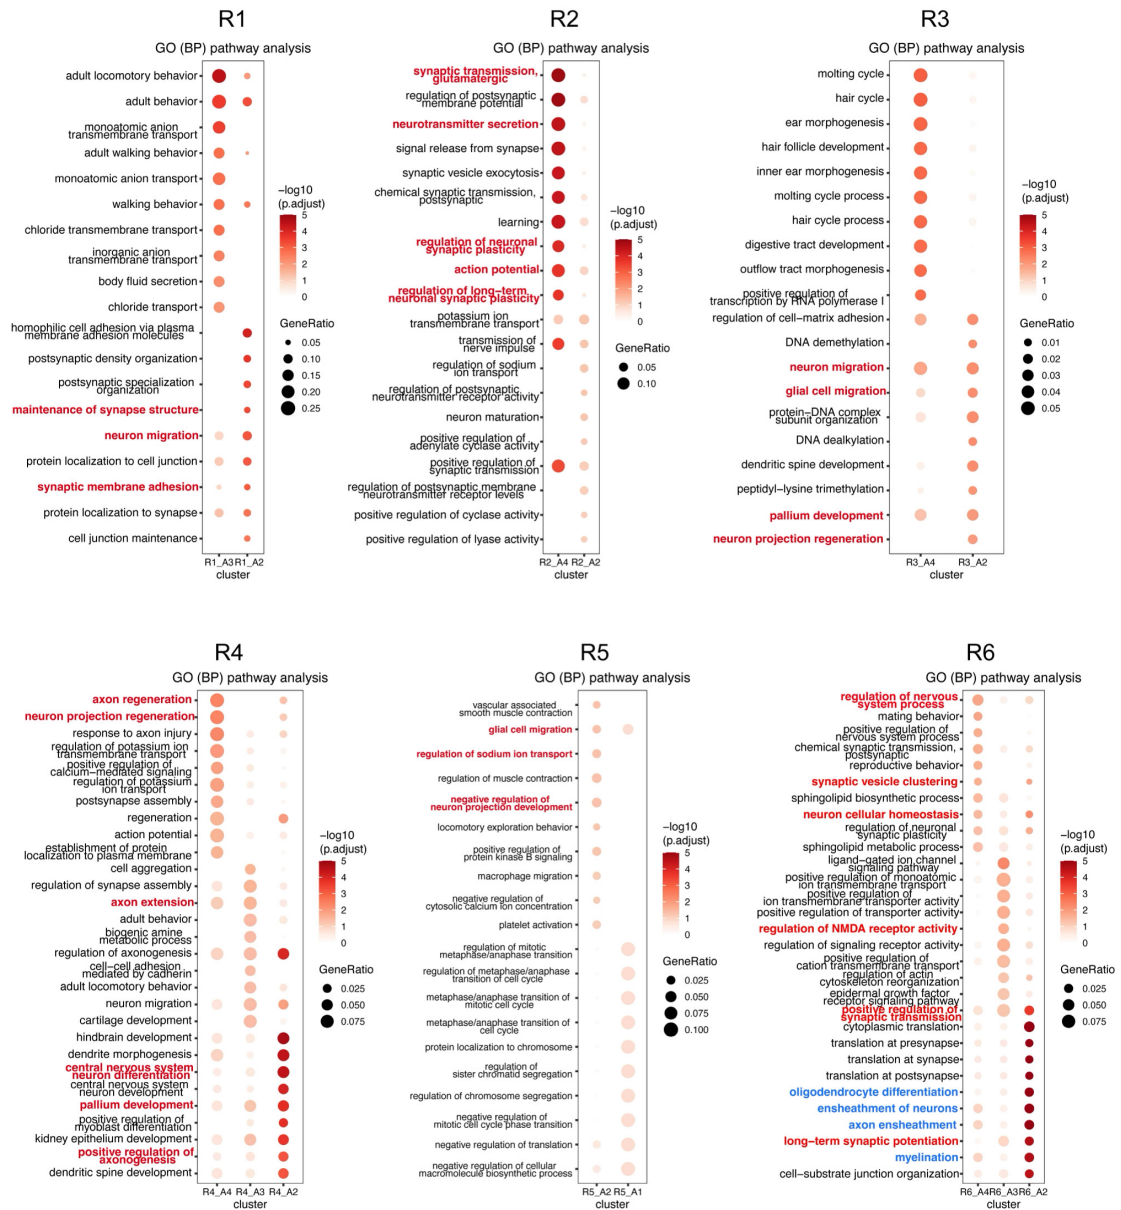

1  
 2 **Extended Data Fig. 16 Further analysis of developing mouse brain corpus callosum. GO**  
 3 **analysis for each RNA cluster (R1-R6) generated from the regression model.**  
 4

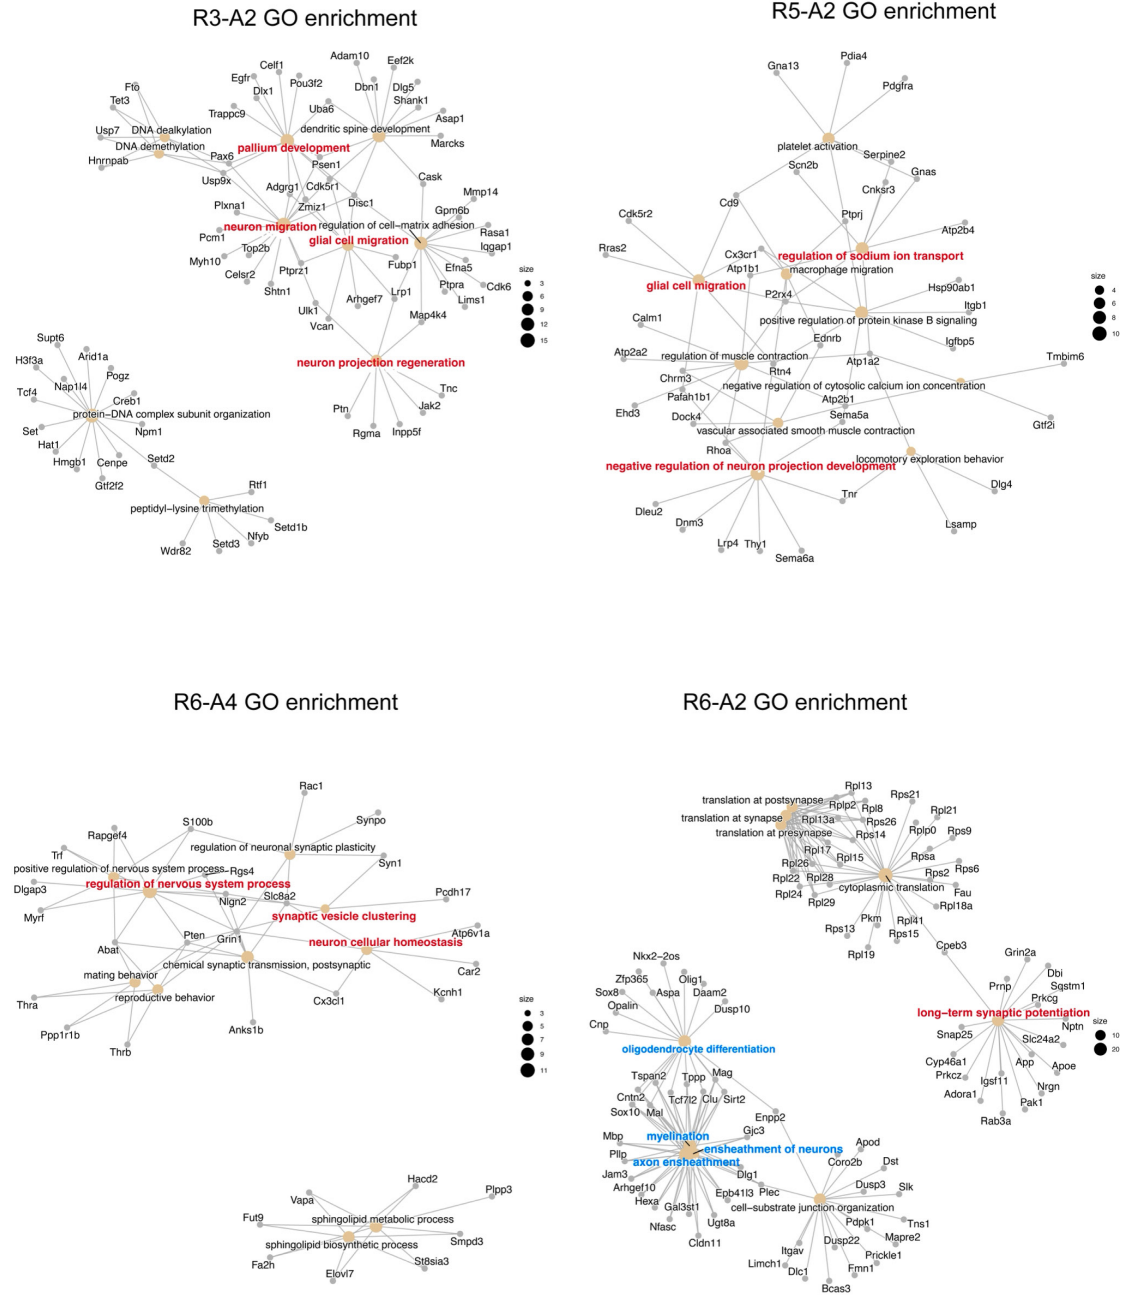

1  
2  
3  
4

**Extended Data Fig. 17** Further analysis of developing mouse brain corpus callosum. GO enrichment analysis for cluster R3-A2, R5-A2, R6-A4, and R6-A2.

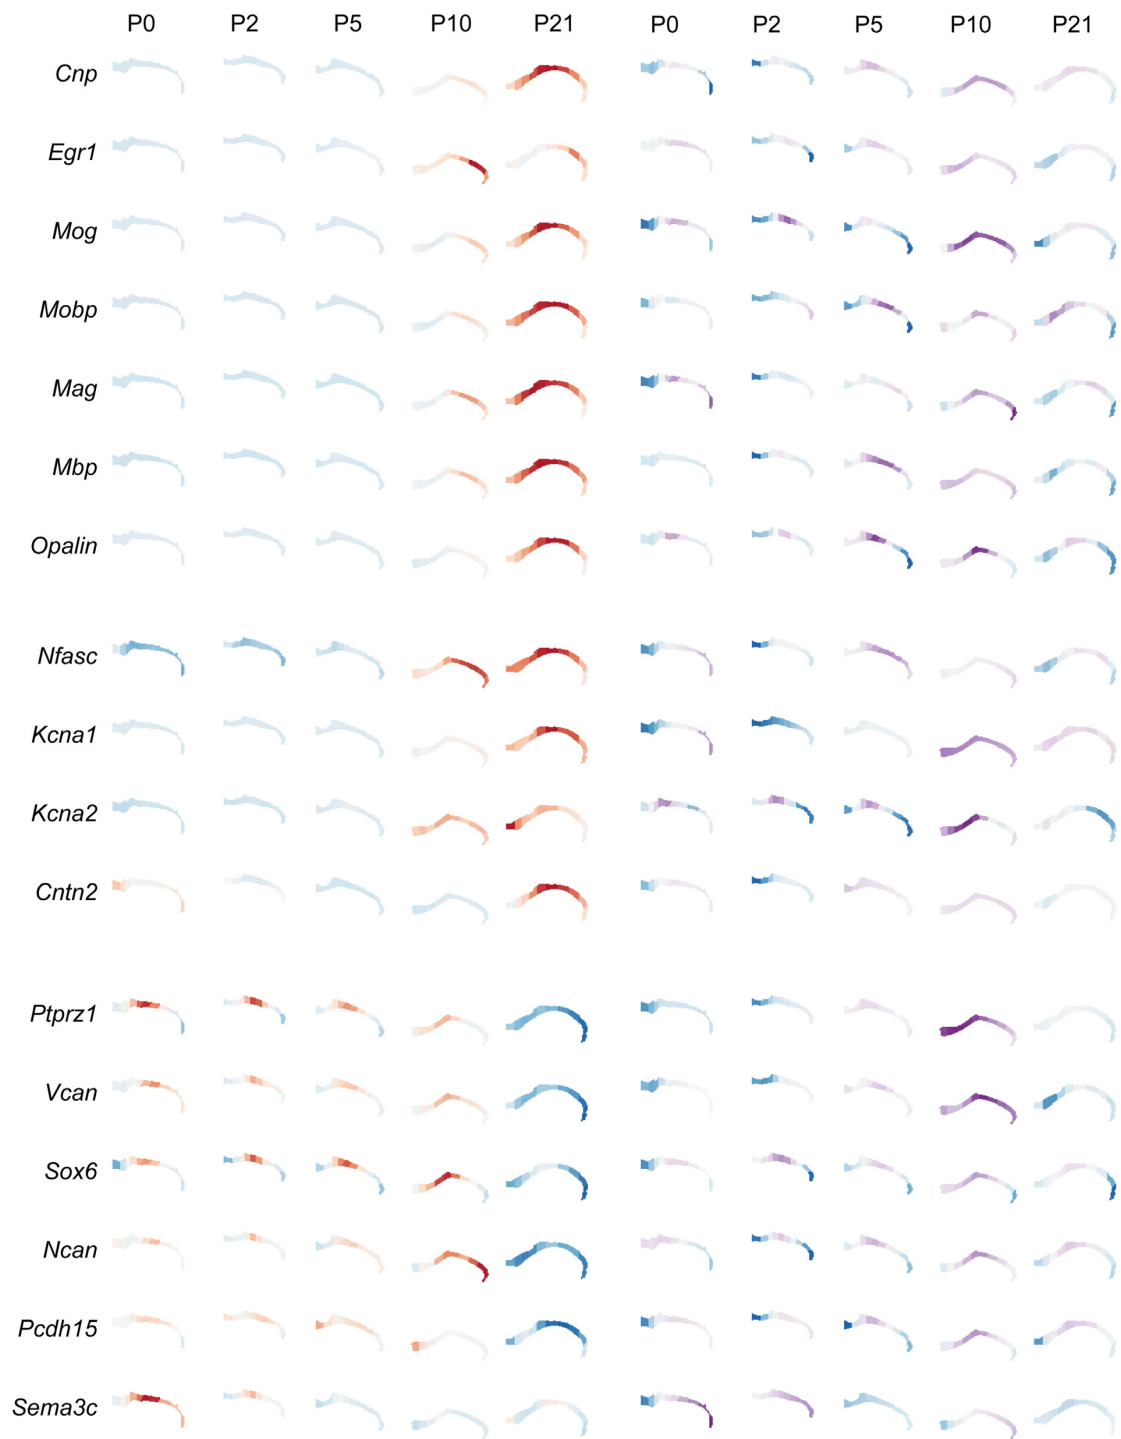

1

2 **Extended Data Fig. 18 Further analysis of developing mouse brain corpus callosum. The**  
 3 RNA gene expression and ATAC GAS calculated on the basis of the regression model for  
 4 specific genes.

5



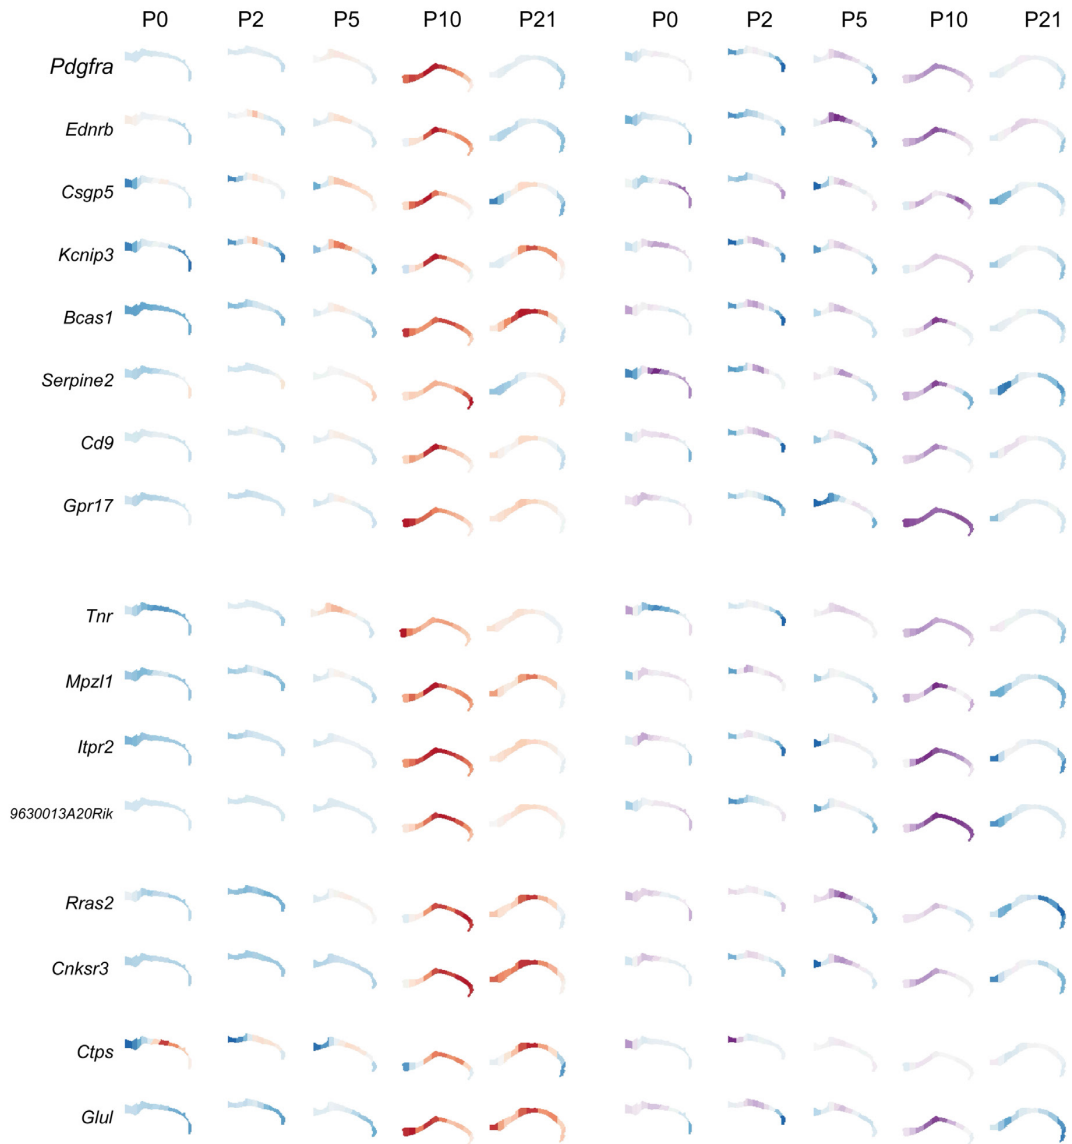

1

2 **Extended Data Fig. 19 Further analysis of developing mouse brain corpus callosum.** The  
 3 RNA gene expression and ATAC GAS calculated on the basis of the regression model for  
 4 specific genes.

5

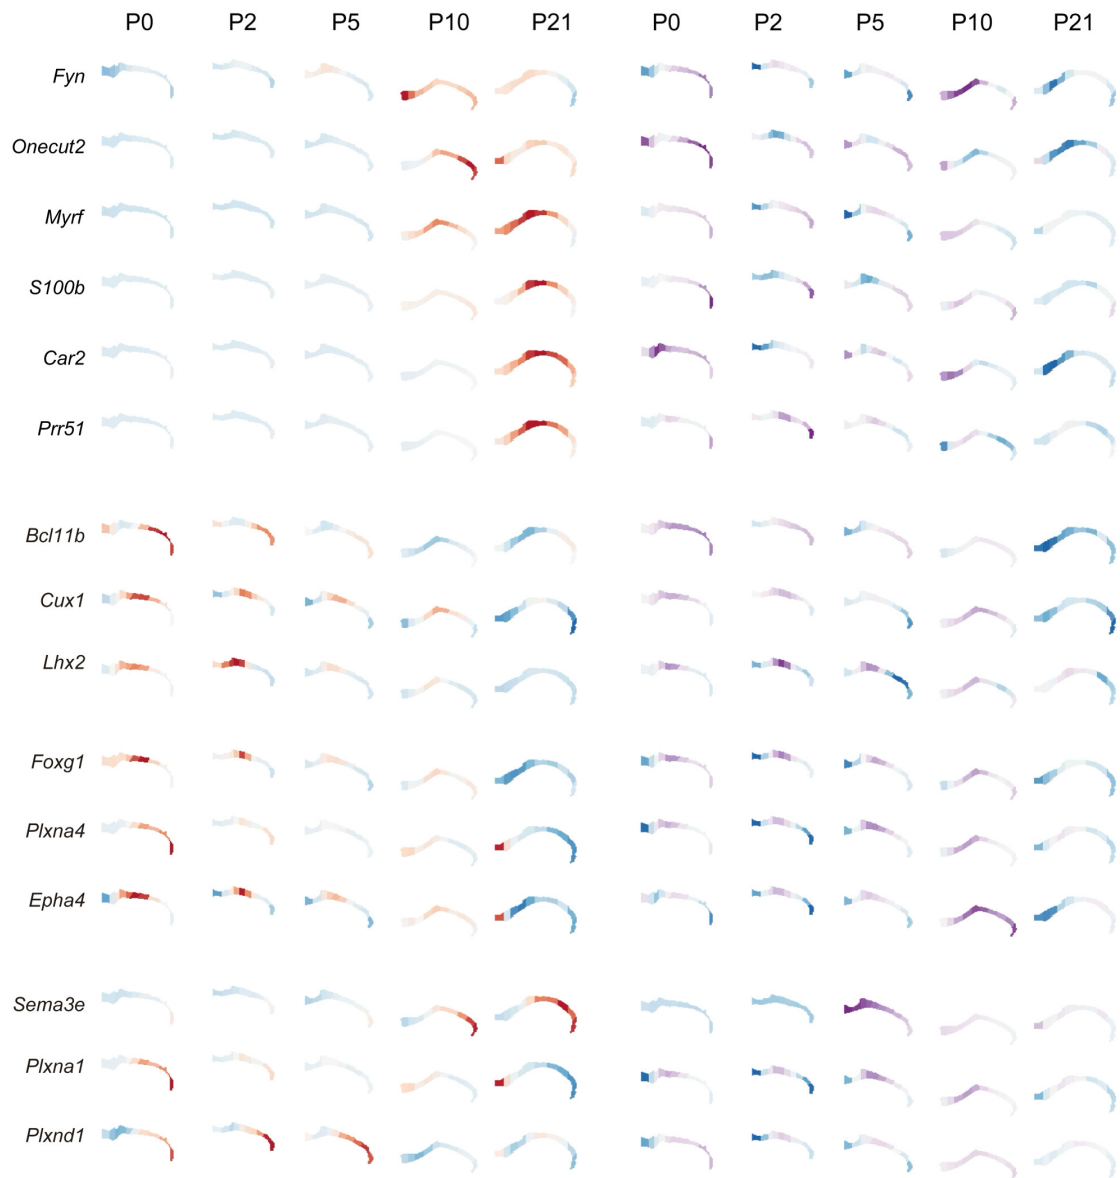

1

2 **Extended Data Fig. 20 Further analysis of developing mouse brain corpus callosum.** The  
 3 RNA gene expression and ATAC GAS calculated on the basis of the regression model for  
 4 specific genes.

5

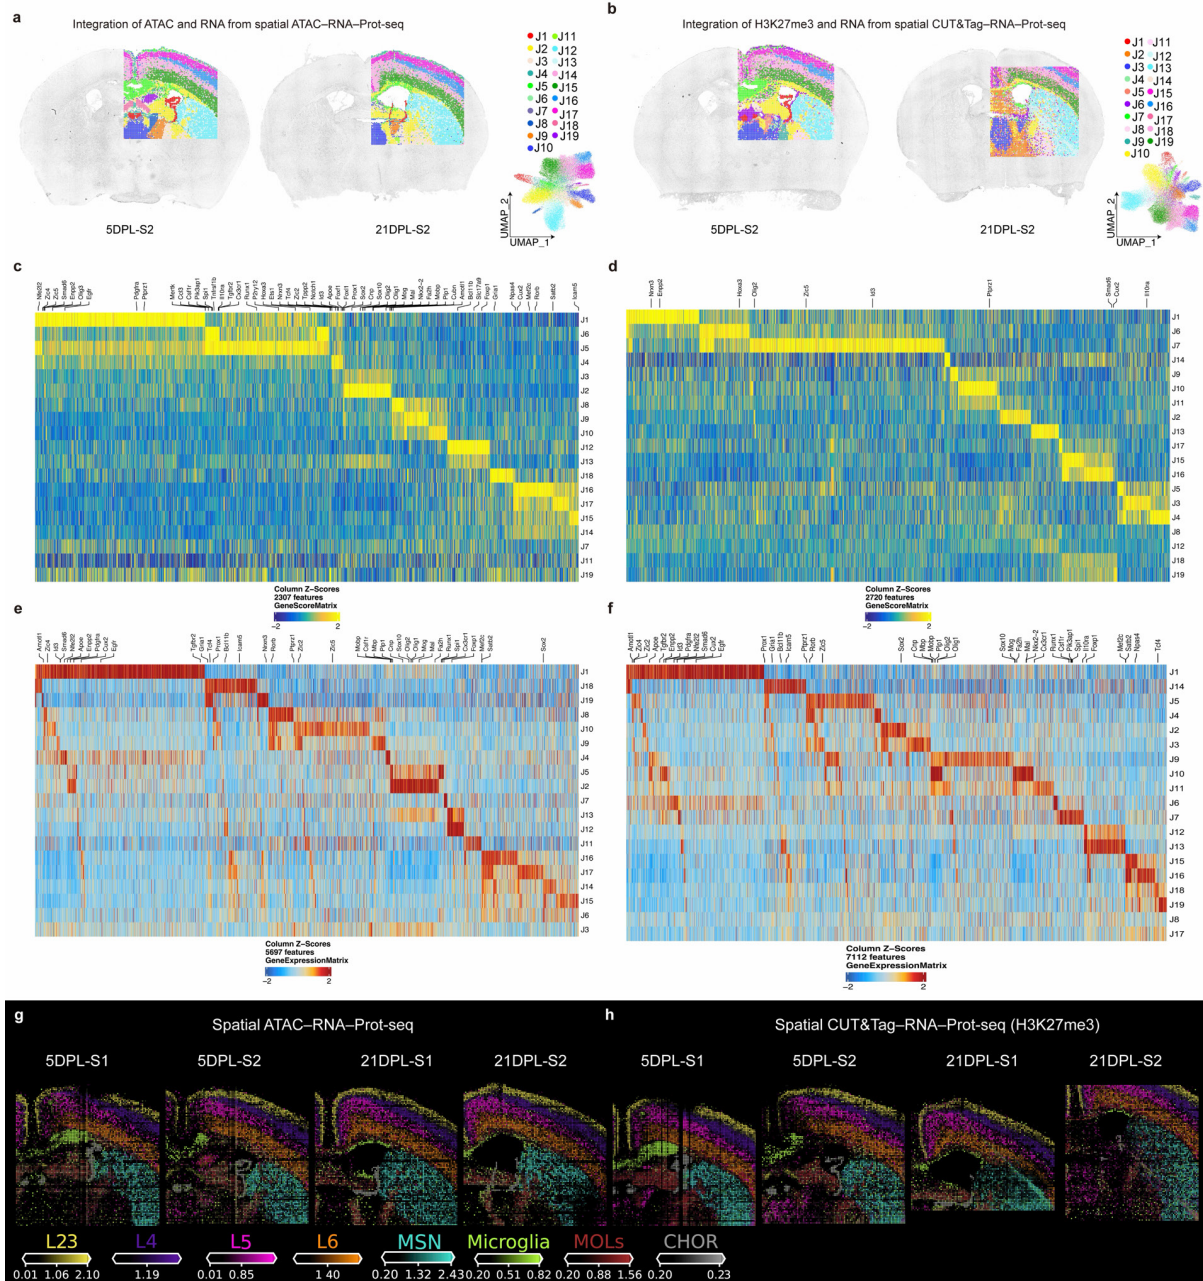

1  
 2 **Extended Data Fig. 21** Further analysis of spatial ATAC–RNA–Prot-seq (DBiT ARP-seq)  
 3 and spatial CUT&Tag–RNA–Prot-seq (DBiT CTRP-seq, targeting H3K27me3) for LPC  
 4 mouse model brains at 5 DPL and 21 DPL. **a**, Integration of RNA and ATAC data in DBiT  
 5 ARP-seq for replicate. **b**, Integration of H3K27me3 and RNA data in DBiT CTRP-seq for  
 6 replicate. **c**, Marker GASSs from each joint cluster in DBiT ARP-seq in **a** and **Fig. 4f**. **d**, Marker  
 7 CSSs from each joint cluster in DBiT CTRP-seq in **b** and **Fig. 4g**. **e**, Marker gene expression  
 8 from each joint cluster in DBiT ARP-seq in **a** and **Fig. 4f**. **f**, Marker gene expression from each  
 9 joint cluster in DBiT CTRP-seq in **b** and **Fig. 4g**. **g-h**, Cell types predicted by cell2location  
 10 from all processed LPC mouse model brains in DBiT ARP-seq (**g**) and DBiT CTRP-seq (**h**).  
 11

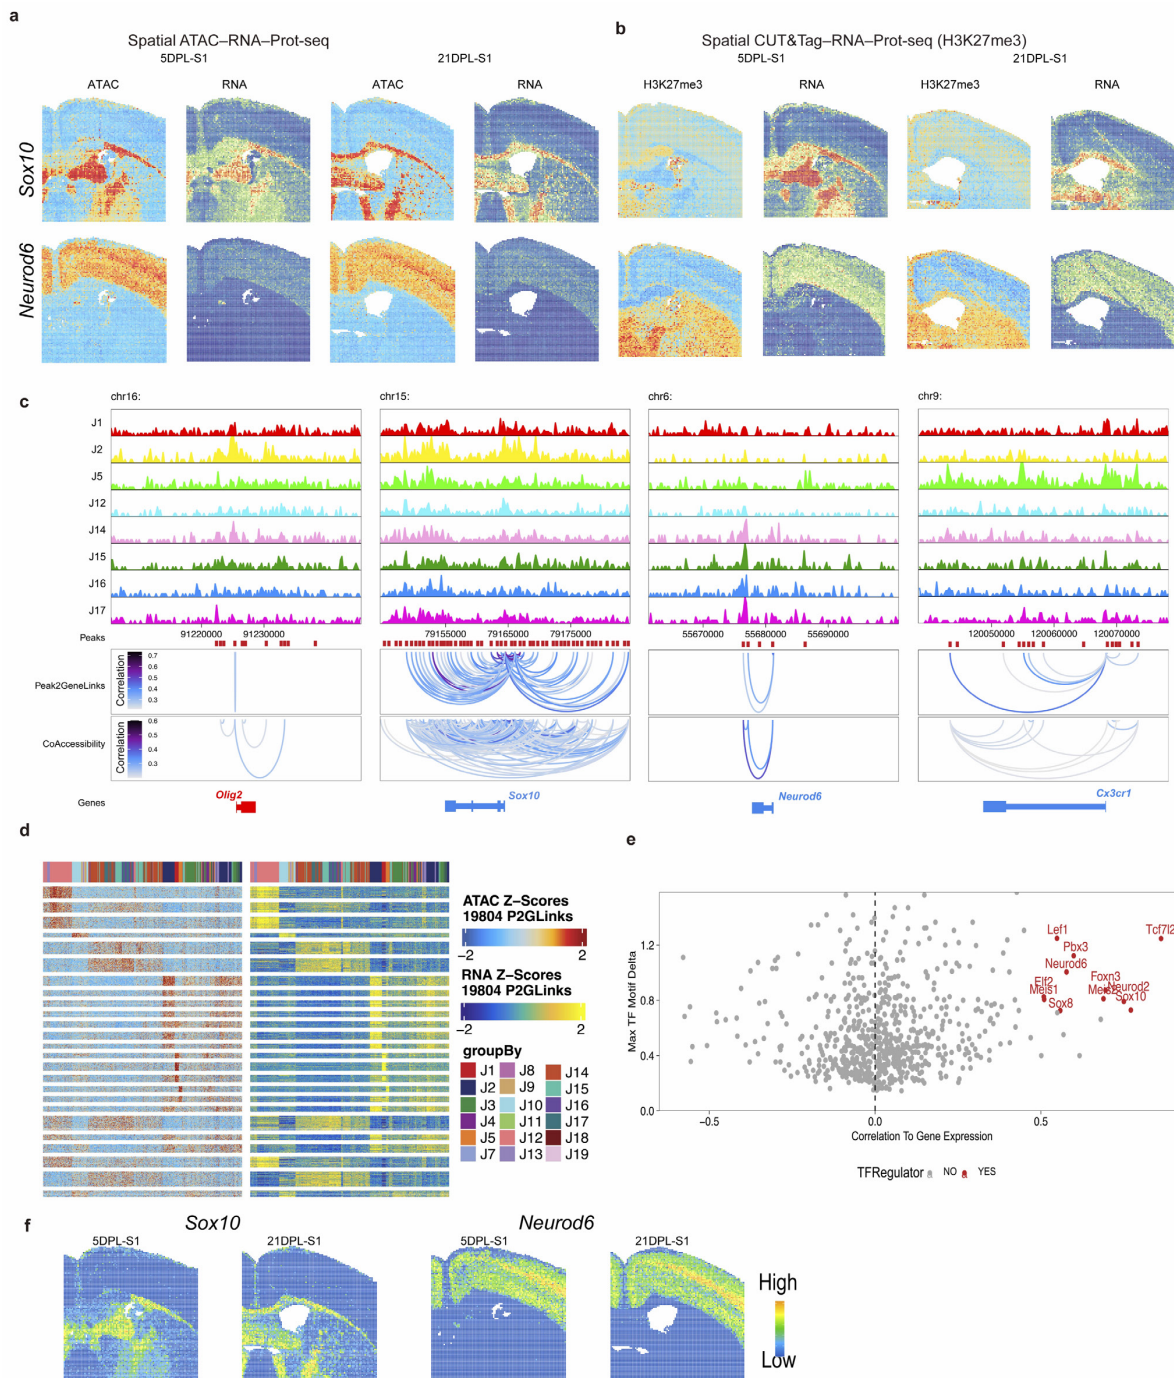

1  
2  
3  
4  
5  
6  
7  
8  
9  
10

**Extended Data Fig. 22 Further analysis of spatial ATAC-RNA-Prot-seq (DBiT ARP-seq) and spatial CUT&Tag-RNA-Prot-seq (DBiT CTRP-seq, targeting H3K27me3) for LPC mouse model brains at 5 DPL and 21 DPL. a-b, Spatial mapping of gene expression and GAS (a), or gene expression and CSS (b) for *Sox10* and *Neurod6* in both DBiT ARP-seq and DBiT CTRP-seq. c, Genome track visualization of marker genes with peak-to-gene links for distal regulatory elements and peak co-accessibility. d, Heatmaps of peak-to-gene links in DBiT ARP-seq. e, Dot plot showing the identification of positive TF regulators. f, Spatial mapping of deviation scores for selected TF motifs from DBiT ARP-seq.**

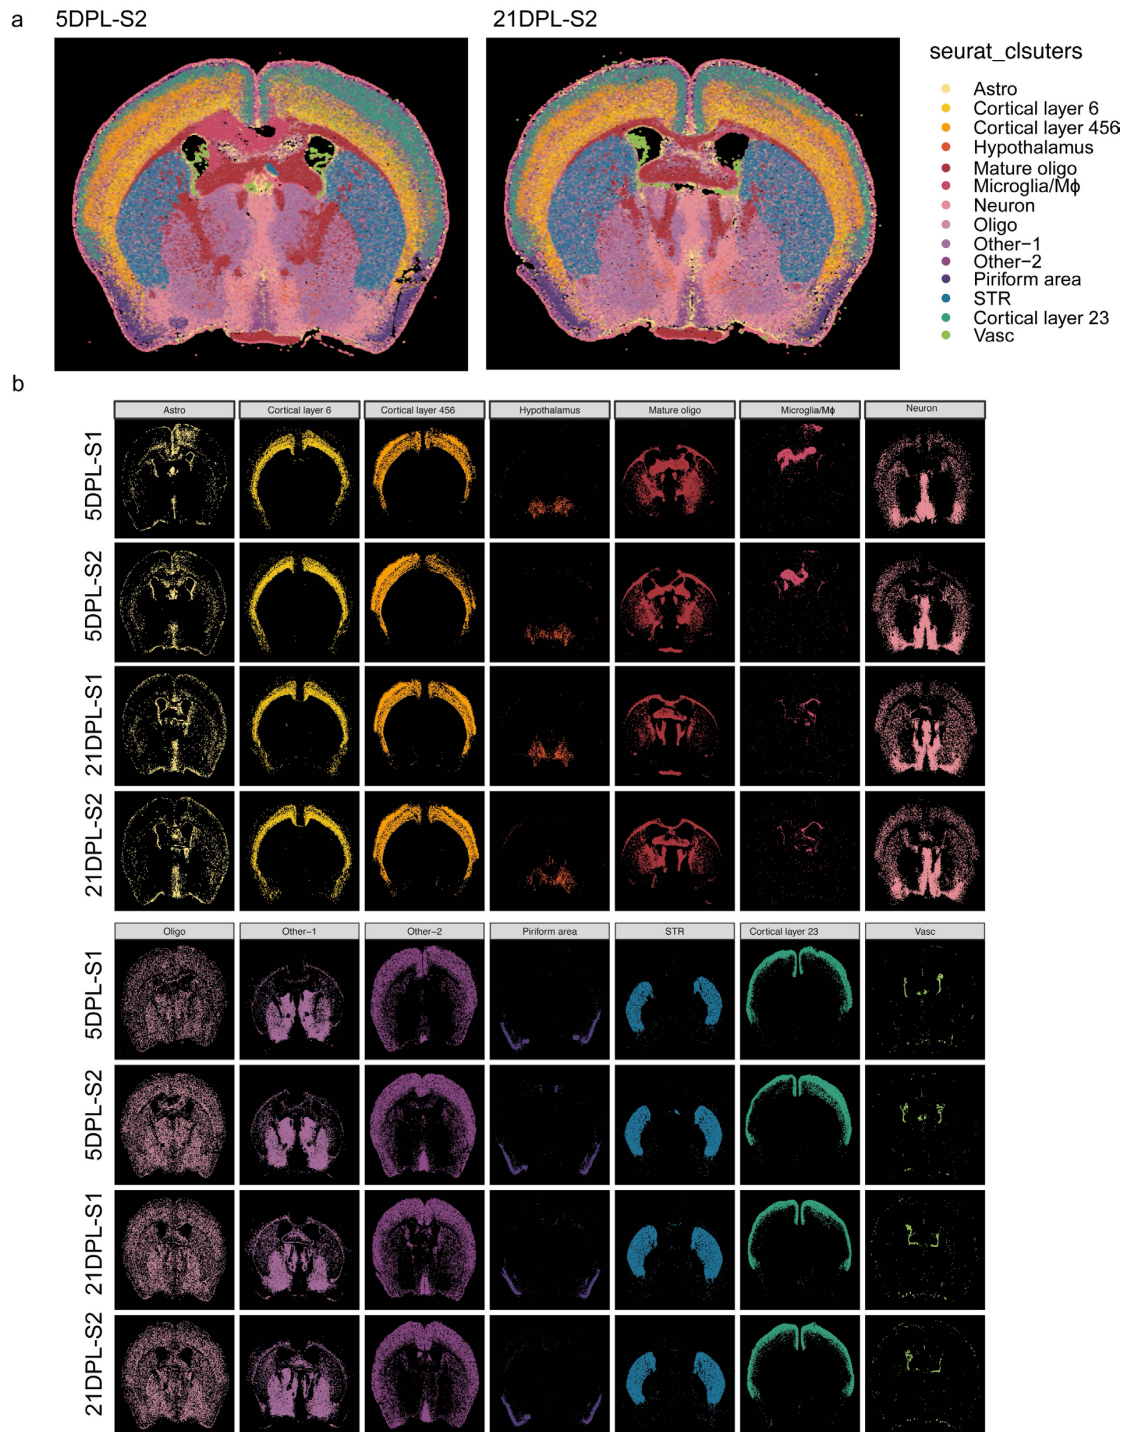

1  
2  
3  
4  
5

**Extended Data Fig. 23 Further analysis for CODEX images of LPC mouse model brains at 5 DPL and 21 DPL. a, Seurat clustering of the CODEX images for replicates. b, Spatial map of the cell types from a.**

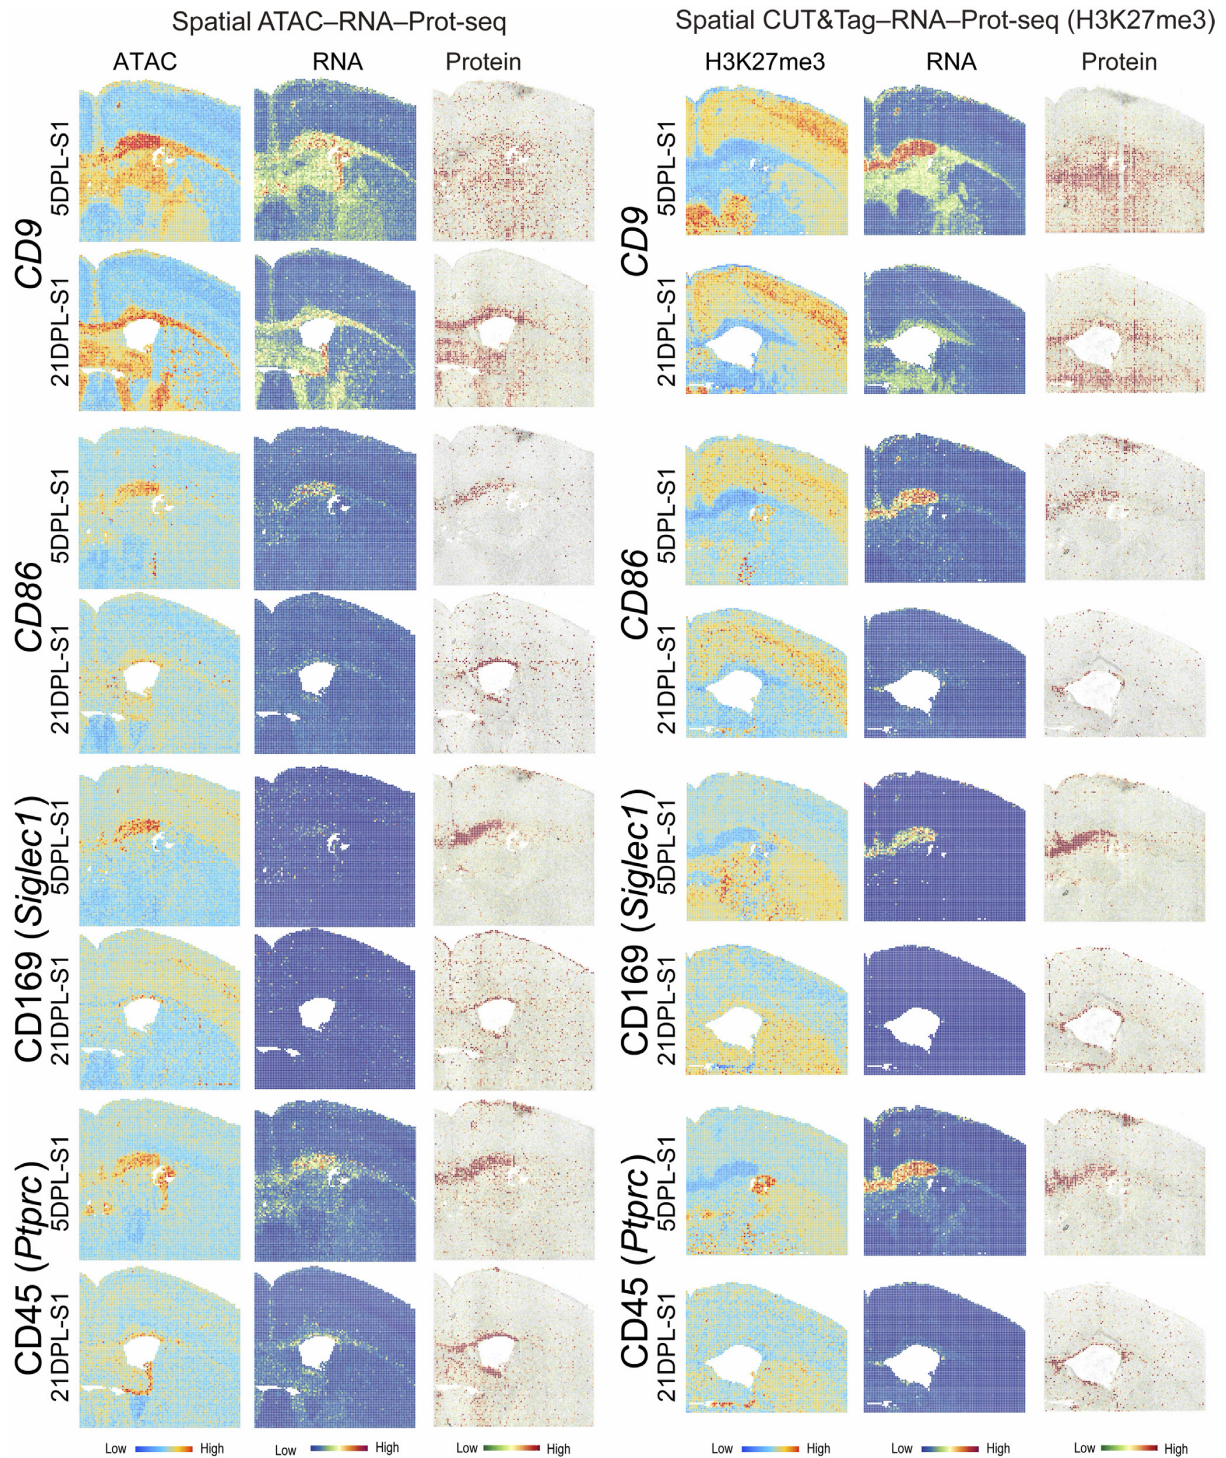

1  
2  
3  
4  
5  
6

**Extended Data Fig. 24** Further analysis of spatial ATAC-RNA-Prot-seq (DBiT ARP-seq) and spatial CUT&Tag-RNA-Prot-seq (DBiT CTRP-seq, targeting H3K27me3) for LPC mouse model brains at 5 DPL and 21 DPL. Spatial mapping of gene expression, GAS, CSS, and ADT protein expression for marker genes in both DBiT ARP-seq and DBiT CTRP-seq.

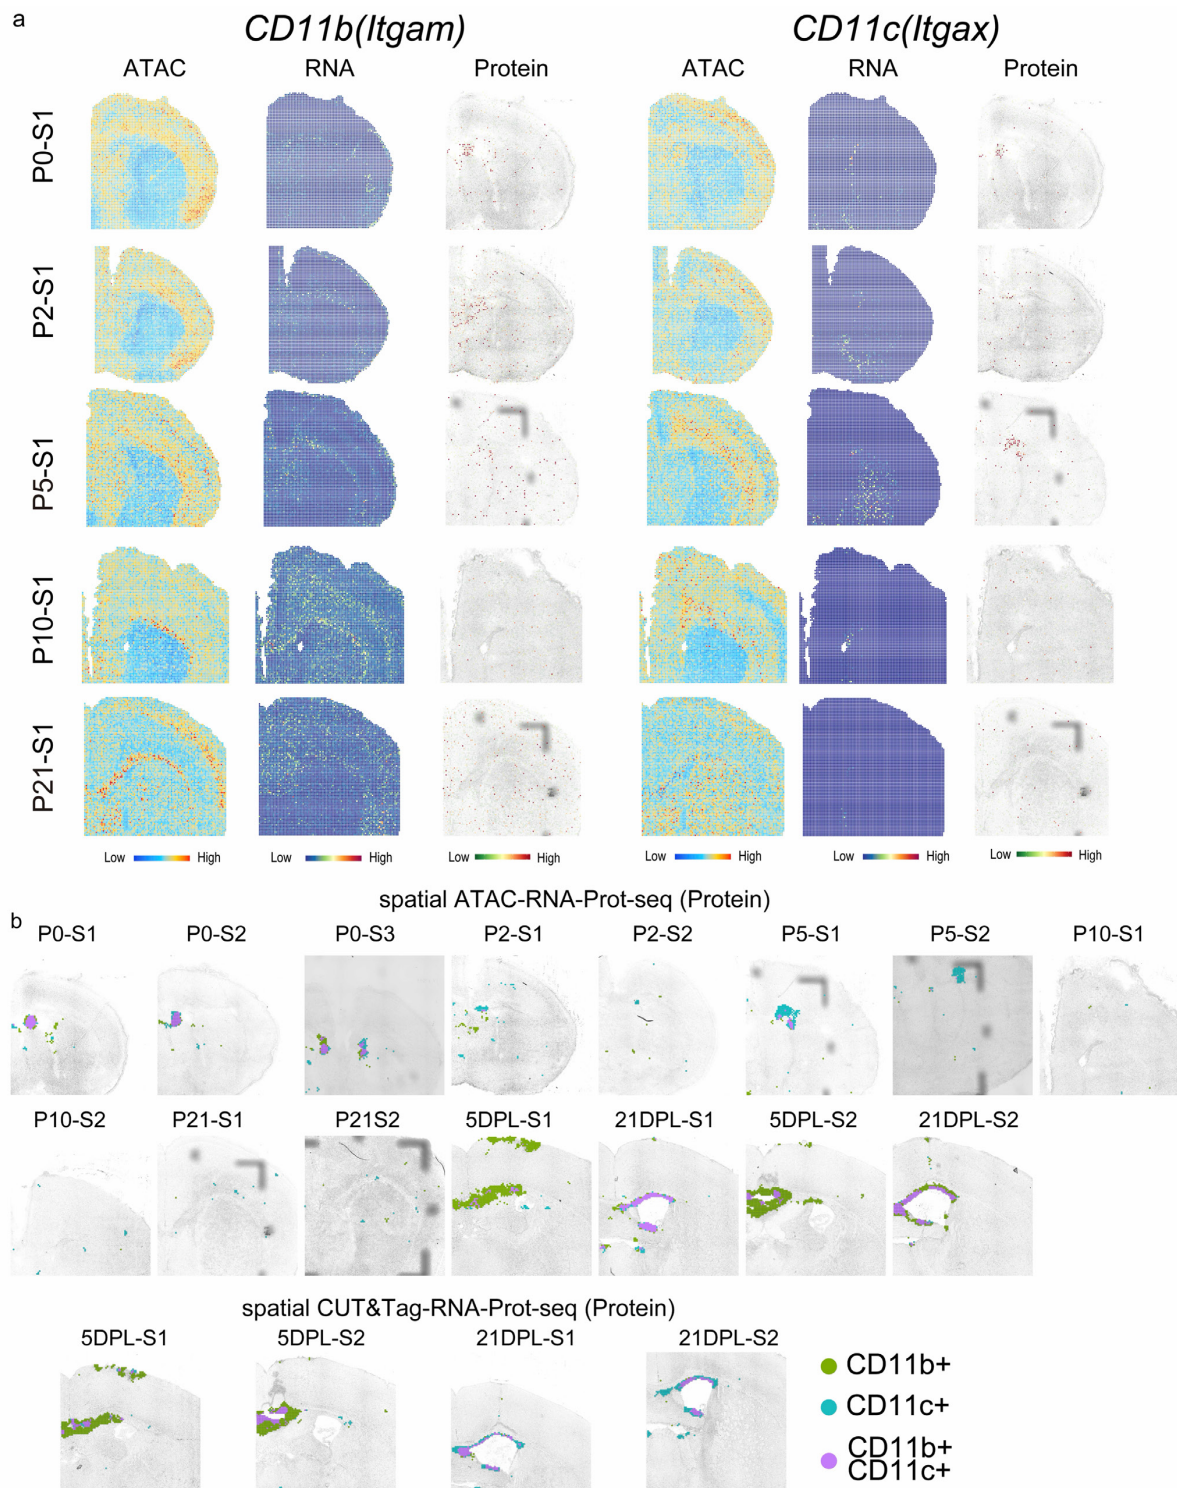

1  
2  
3  
4  
5  
6

**Extended Data Fig. 25 Further analysis for microglia.** **a**, Spatial mapping of gene expression, ATAC, and ADT protein expression for *Itgam* (CD11b) and *Itgax* (CD11c) in both DBiT ARP-seq and DBiT CTRP-seq. **b**, The ADT protein co-expression of CD11b and CD11c for developing and LPC mouse brains (including the replicate).

1 **Extended Data Table 1. DNA oligos used for transposome assembly, PCR, and**  
 2 **preparation of sequencing library.**

|                   |                                                                                                   |
|-------------------|---------------------------------------------------------------------------------------------------|
| RT primer         | /5Phos/CATCGGCGTACGACTNNNNNNNNNN/iBiodT/TTTTTTTT<br>TTTTTTTTVN                                    |
| Ligation linker 1 | AGTCGTACGCCGATGCGAAACATCGGCCAC                                                                    |
| Ligation linker 2 | CGAATGCTCTGGCCTCTCAAGCACGTGGAT                                                                    |
| PCR Primer 1      | CAAGCGTTGGCTTCTCGCATCT                                                                            |
| PCR Primer 2      | AAGCAGTGGTATCAACGCAGAGT                                                                           |
| N501              | AATGATACGGCGACCACCGAGATCTACACTAGATCGCTCGTCG<br>GCAGCGTCAGATGTGTATAAGAGACAG                        |
| N701              | CAAGCAGAAGACGGCATAACGAGATTCGCCTTAGTCTCGTGGG<br>CTCGGAGATGTGTATAAGAGACAGCAAGCGTTGGCTTCTCGC<br>ATCT |
| N702              | CAAGCAGAAGACGGCATAACGAGATCTAGTACGGTCTCGTGGG<br>CTCGGAGATGTGTATAAGAGACAGCAAGCGTTGGCTTCTCGC<br>ATCT |
| N703              | CAAGCAGAAGACGGCATAACGAGATTTCTGCCTGTCTCGTGGG<br>CTCGGAGATGTGTATAAGAGACAGCAAGCGTTGGCTTCTCGC<br>ATCT |
| N704              | CAAGCAGAAGACGGCATAACGAGATGCTCAGGAGTCTCGTGGG<br>CTCGGAGATGTGTATAAGAGACAGCAAGCGTTGGCTTCTCGC<br>ATCT |
| N705              | CAAGCAGAAGACGGCATAACGAGATAGGAGTCCGTCTCGTGGG<br>CTCGGAGATGTGTATAAGAGACAGCAAGCGTTGGCTTCTCGC<br>ATCT |
| N706              | CAAGCAGAAGACGGCATAACGAGATCATGCCTAGTCTCGTGGG<br>CTCGGAGATGTGTATAAGAGACAGCAAGCGTTGGCTTCTCGC<br>ATCT |
| N707              | CAAGCAGAAGACGGCATAACGAGATGTAGAGAGGTCTCGTGGG<br>CTCGGAGATGTGTATAAGAGACAGCAAGCGTTGGCTTCTCGC<br>ATCT |
| Tn5ME-A           | 5'-TCGTCCGCAGCGTCAGATGTGTATAAGAGACAG-3'                                                           |
| Tn5MErev          | 5'-/5Phos/CTGTCTCTTATACACATCT-3'                                                                  |
| Tn5ME-B           | 5'-/5Phos/CATCGGCGTACGACTAGATGTGTATAAGAGACAG-3'                                                   |

3  
4



1 **Extended Data Table 2. DNA barcode A sequences.**

| <b>Barcode A</b> | <b>Sequence</b>                                |
|------------------|------------------------------------------------|
| Barcode A-1      | /5Phos/AGGCCAGAGCATTTCGAACGTGATGTGGCCGATGTTTCG |
| Barcode A-2      | /5Phos/AGGCCAGAGCATTTCGAAACATCGGTGGCCGATGTTTCG |
| Barcode A-3      | /5Phos/AGGCCAGAGCATTTCGATGCCTAAGTGGCCGATGTTTCG |
| Barcode A-4      | /5Phos/AGGCCAGAGCATTTCGAGTGGTCAGTGGCCGATGTTTCG |
| Barcode A-5      | /5Phos/AGGCCAGAGCATTTCGACCACTGTGTGGCCGATGTTTCG |
| Barcode A-6      | /5Phos/AGGCCAGAGCATTTCGACATTGGCGTGGCCGATGTTTCG |
| Barcode A-7      | /5Phos/AGGCCAGAGCATTTCGCAGATCTGGTGGCCGATGTTTCG |
| Barcode A-8      | /5Phos/AGGCCAGAGCATTTCGCATCAAGTGTGGCCGATGTTTCG |
| Barcode A-9      | /5Phos/AGGCCAGAGCATTTCGCGCTGATCGTGGCCGATGTTTCG |
| Barcode A-10     | /5Phos/AGGCCAGAGCATTTCGACAAGCTAGTGGCCGATGTTTCG |
| Barcode A-11     | /5Phos/AGGCCAGAGCATTTCGCTGTAGCCGTGGCCGATGTTTCG |
| Barcode A-12     | /5Phos/AGGCCAGAGCATTTCGAGTACAAGGTGGCCGATGTTTCG |
| Barcode A-13     | /5Phos/AGGCCAGAGCATTTCGAACAACCAGTGGCCGATGTTTCG |
| Barcode A-14     | /5Phos/AGGCCAGAGCATTTCGAACCGAGAGTGGCCGATGTTTCG |
| Barcode A-15     | /5Phos/AGGCCAGAGCATTTCGAACGCTTAGTGGCCGATGTTTCG |
| Barcode A-16     | /5Phos/AGGCCAGAGCATTTCGAAGACGGAGTGGCCGATGTTTCG |
| Barcode A-17     | /5Phos/AGGCCAGAGCATTTCGAAGGTACAGTGGCCGATGTTTCG |
| Barcode A-18     | /5Phos/AGGCCAGAGCATTTCGACACAGAAGTGGCCGATGTTTCG |
| Barcode A-19     | /5Phos/AGGCCAGAGCATTTCGACAGCAGAGTGGCCGATGTTTCG |
| Barcode A-20     | /5Phos/AGGCCAGAGCATTTCGACCTCCAAGTGGCCGATGTTTCG |
| Barcode A-21     | /5Phos/AGGCCAGAGCATTTCGACGCTCGAGTGGCCGATGTTTCG |
| Barcode A-22     | /5Phos/AGGCCAGAGCATTTCGACGTATCAGTGGCCGATGTTTCG |
| Barcode A-23     | /5Phos/AGGCCAGAGCATTTCGACTATGCAGTGGCCGATGTTTCG |
| Barcode A-24     | /5Phos/AGGCCAGAGCATTTCGAGAGTCAAGTGGCCGATGTTTCG |
| Barcode A-25     | /5Phos/AGGCCAGAGCATTTCGAGATCGCAGTGGCCGATGTTTCG |
| Barcode A-26     | /5Phos/AGGCCAGAGCATTTCGAGCAGGAAGTGGCCGATGTTTCG |
| Barcode A-27     | /5Phos/AGGCCAGAGCATTTCGAGTCACTAGTGGCCGATGTTTCG |
| Barcode A-28     | /5Phos/AGGCCAGAGCATTTCGATCCTGTAGTGGCCGATGTTTCG |
| Barcode A-29     | /5Phos/AGGCCAGAGCATTTCGATTGAGGAGTGGCCGATGTTTCG |
| Barcode A-30     | /5Phos/AGGCCAGAGCATTTCGCAACCACAGTGGCCGATGTTTCG |
| Barcode A-31     | /5Phos/AGGCCAGAGCATTTCGGACTAGTAGTGGCCGATGTTTCG |
| Barcode A-32     | /5Phos/AGGCCAGAGCATTTCGCAATGGAAGTGGCCGATGTTTCG |
| Barcode A-33     | /5Phos/AGGCCAGAGCATTTCGCACTTCGAGTGGCCGATGTTTCG |
| Barcode A-34     | /5Phos/AGGCCAGAGCATTTCGACGCTTAGTGGCCGATGTTTCG  |
| Barcode A-35     | /5Phos/AGGCCAGAGCATTTCGCATACCAAGTGGCCGATGTTTCG |

|              |                                                 |
|--------------|-------------------------------------------------|
| Barcode A-36 | /5Phos/AGGCCAGAGCATTTCGCCAGTTCAGTGGCCGATGTTTCG  |
| Barcode A-37 | /5Phos/AGGCCAGAGCATTTCGCCGAAGTAGTGGCCGATGTTTCG  |
| Barcode A-38 | /5Phos/AGGCCAGAGCATTTCGCCGTGAGAGTGGCCGATGTTTCG  |
| Barcode A-39 | /5Phos/AGGCCAGAGCATTTCGCCTCCTGAGTGGCCGATGTTTCG  |
| Barcode A-40 | /5Phos/AGGCCAGAGCATTTCGCGAACTTAGTGGCCGATGTTTCG  |
| Barcode A-41 | /5Phos/AGGCCAGAGCATTTCGCGACTGGAGTGGCCGATGTTTCG  |
| Barcode A-42 | /5Phos/AGGCCAGAGCATTTCGCGCATAACAGTGGCCGATGTTTCG |
| Barcode A-43 | /5Phos/AGGCCAGAGCATTTCGCTCAATGAGTGGCCGATGTTTCG  |
| Barcode A-44 | /5Phos/AGGCCAGAGCATTTCGCTGAGCCAGTGGCCGATGTTTCG  |
| Barcode A-45 | /5Phos/AGGCCAGAGCATTTCGCTGGCATAAGTGGCCGATGTTTCG |
| Barcode A-46 | /5Phos/AGGCCAGAGCATTTCGGAATCTGAGTGGCCGATGTTTCG  |
| Barcode A-47 | /5Phos/AGGCCAGAGCATTTCGCAAGACTAGTGGCCGATGTTTCG  |
| Barcode A-48 | /5Phos/AGGCCAGAGCATTTCGGAGCTGAAGTGGCCGATGTTTCG  |
| Barcode A-49 | /5Phos/AGGCCAGAGCATTTCGGATAGACAGTGGCCGATGTTTCG  |
| Barcode A-50 | /5Phos/AGGCCAGAGCATTTCGGCCACATAGTGGCCGATGTTTCG  |
| Barcode A-51 | /5Phos/AGGCCAGAGCATTTCGGCGAGTAAGTGGCCGATGTTTCG  |
| Barcode A-52 | /5Phos/AGGCCAGAGCATTTCGGCTAACGAGTGGCCGATGTTTCG  |
| Barcode A-53 | /5Phos/AGGCCAGAGCATTTCGGCTCGGTAGTGGCCGATGTTTCG  |
| Barcode A-54 | /5Phos/AGGCCAGAGCATTTCGGGAGAACAGTGGCCGATGTTTCG  |
| Barcode A-55 | /5Phos/AGGCCAGAGCATTTCGGGTGCGAAGTGGCCGATGTTTCG  |
| Barcode A-56 | /5Phos/AGGCCAGAGCATTTCGGTACGCAAGTGGCCGATGTTTCG  |
| Barcode A-57 | /5Phos/AGGCCAGAGCATTTCGGTCGTAGAGTGGCCGATGTTTCG  |
| Barcode A-58 | /5Phos/AGGCCAGAGCATTTCGGTCTGTCAGTGGCCGATGTTTCG  |
| Barcode A-59 | /5Phos/AGGCCAGAGCATTTCGGTGTCTAGTGGCCGATGTTTCG   |
| Barcode A-60 | /5Phos/AGGCCAGAGCATTTCGTAGGATGAGTGGCCGATGTTTCG  |
| Barcode A-61 | /5Phos/AGGCCAGAGCATTTCGTATCAGCAGTGGCCGATGTTTCG  |
| Barcode A-62 | /5Phos/AGGCCAGAGCATTTCGTCCGTCTAGTGGCCGATGTTTCG  |
| Barcode A-63 | /5Phos/AGGCCAGAGCATTTCGTCTTCACAGTGGCCGATGTTTCG  |
| Barcode A-64 | /5Phos/AGGCCAGAGCATTTCGTGAAGAGAGTGGCCGATGTTTCG  |
| Barcode A-65 | /5Phos/AGGCCAGAGCATTTCGTGGAACAAGTGGCCGATGTTTCG  |
| Barcode A-66 | /5Phos/AGGCCAGAGCATTTCGTGGCTTCAGTGGCCGATGTTTCG  |
| Barcode A-67 | /5Phos/AGGCCAGAGCATTTCGTGGTGGTAGTGGCCGATGTTTCG  |
| Barcode A-68 | /5Phos/AGGCCAGAGCATTTCGTTACGCAGTGGCCGATGTTTCG   |
| Barcode A-69 | /5Phos/AGGCCAGAGCATTTCGAACTCACCGTGGCCGATGTTTCG  |
| Barcode A-70 | /5Phos/AGGCCAGAGCATTTCGAAGAGATCGTGGCCGATGTTTCG  |
| Barcode A-71 | /5Phos/AGGCCAGAGCATTTCGAAGGACACGTGGCCGATGTTTCG  |
| Barcode A-72 | /5Phos/AGGCCAGAGCATTTCGAATCCGTCGTGGCCGATGTTTCG  |

|               |                                                |
|---------------|------------------------------------------------|
| Barcode A-73  | /5Phos/AGGCCAGAGCATTTCGAATGTTGCGTGGCCGATGTTTCG |
| Barcode A-74  | /5Phos/AGGCCAGAGCATTTCGACACGACCGTGGCCGATGTTTCG |
| Barcode A-75  | /5Phos/AGGCCAGAGCATTTCGACAGATTCGTGGCCGATGTTTCG |
| Barcode A-76  | /5Phos/AGGCCAGAGCATTTCGAGATGTACGTGGCCGATGTTTCG |
| Barcode A-77  | /5Phos/AGGCCAGAGCATTTCGAGCACCTCGTGGCCGATGTTTCG |
| Barcode A-78  | /5Phos/AGGCCAGAGCATTTCGAGCCATGCGTGGCCGATGTTTCG |
| Barcode A-79  | /5Phos/AGGCCAGAGCATTTCGAGGCTAACGTGGCCGATGTTTCG |
| Barcode A-80  | /5Phos/AGGCCAGAGCATTTCGATAGCGACGTGGCCGATGTTTCG |
| Barcode A-81  | /5Phos/AGGCCAGAGCATTTCGATCATTCCGTGGCCGATGTTTCG |
| Barcode A-82  | /5Phos/AGGCCAGAGCATTTCGATTGGCTCGTGGCCGATGTTTCG |
| Barcode A-83  | /5Phos/AGGCCAGAGCATTTCGCAAGGAGCGTGGCCGATGTTTCG |
| Barcode A-84  | /5Phos/AGGCCAGAGCATTTCGCACCTTACGTGGCCGATGTTTCG |
| Barcode A-85  | /5Phos/AGGCCAGAGCATTTCGCCATCCTCGTGGCCGATGTTTCG |
| Barcode A-86  | /5Phos/AGGCCAGAGCATTTCGCCGACAACGTGGCCGATGTTTCG |
| Barcode A-87  | /5Phos/AGGCCAGAGCATTTCGCCTAATCCGTGGCCGATGTTTCG |
| Barcode A-88  | /5Phos/AGGCCAGAGCATTTCGCCTCTATCGTGGCCGATGTTTCG |
| Barcode A-89  | /5Phos/AGGCCAGAGCATTTCGCGACACACGTGGCCGATGTTTCG |
| Barcode A-90  | /5Phos/AGGCCAGAGCATTTCGCGGATTGCGTGGCCGATGTTTCG |
| Barcode A-91  | /5Phos/AGGCCAGAGCATTTCGCTAAGGTCGTGGCCGATGTTTCG |
| Barcode A-92  | /5Phos/AGGCCAGAGCATTTCGGAACAGGCGTGGCCGATGTTTCG |
| Barcode A-93  | /5Phos/AGGCCAGAGCATTTCGGACAGTGCCTGGCCGATGTTTCG |
| Barcode A-94  | /5Phos/AGGCCAGAGCATTTCGGAGTTAGCGTGGCCGATGTTTCG |
| Barcode A-95  | /5Phos/AGGCCAGAGCATTTCGGATGAATCGTGGCCGATGTTTCG |
| Barcode A-96  | /5Phos/AGGCCAGAGCATTTCGGCCAAGACGTGGCCGATGTTTCG |
| Barcode A-97  | /5Phos/AGGCCAGAGCATTTCGCGGAAGAAGTGGCCGATGTTTCG |
| Barcode A-98  | /5Phos/AGGCCAGAGCATTTCGGTGACAAGGTGGCCGATGTTTCG |
| Barcode A-99  | /5Phos/AGGCCAGAGCATTTCGGAACCAGAGTGGCCGATGTTTCG |
| Barcode A-100 | /5Phos/AGGCCAGAGCATTTCGTTGCTGGAGTGGCCGATGTTTCG |

1

1 **Extended Data Table 3. DNA barcode B sequences.**

| <b>Barcode B</b> | <b>Sequence</b>                               |
|------------------|-----------------------------------------------|
| Barcode B-1      | CAAGCGTTGGCTTCTCGCATCTAACGTGATATCCACGTGCTTGAG |
| Barcode B-2      | CAAGCGTTGGCTTCTCGCATCTAACATCGATCCACGTGCTTGAG  |
| Barcode B-3      | CAAGCGTTGGCTTCTCGCATCTATGCCTAAATCCACGTGCTTGAG |
| Barcode B-4      | CAAGCGTTGGCTTCTCGCATCTAGTGGTCAATCCACGTGCTTGAG |
| Barcode B-5      | CAAGCGTTGGCTTCTCGCATCTACCACTGTATCCACGTGCTTGAG |
| Barcode B-6      | CAAGCGTTGGCTTCTCGCATCTACATTGGCATCCACGTGCTTGAG |
| Barcode B-7      | CAAGCGTTGGCTTCTCGCATCTCAGATCTGATCCACGTGCTTGAG |
| Barcode B-8      | CAAGCGTTGGCTTCTCGCATCTCATCAAGTATCCACGTGCTTGAG |
| Barcode B-9      | CAAGCGTTGGCTTCTCGCATCTCGCTGATCATCCACGTGCTTGAG |
| Barcode B-10     | CAAGCGTTGGCTTCTCGCATCTACAAGCTAATCCACGTGCTTGAG |
| Barcode B-11     | CAAGCGTTGGCTTCTCGCATCTCTGTAGCCATCCACGTGCTTGAG |
| Barcode B-12     | CAAGCGTTGGCTTCTCGCATCTAGTACAAGATCCACGTGCTTGAG |
| Barcode B-13     | CAAGCGTTGGCTTCTCGCATCTAACAACCAATCCACGTGCTTGAG |
| Barcode B-14     | CAAGCGTTGGCTTCTCGCATCTAACCGAGAATCCACGTGCTTGAG |
| Barcode B-15     | CAAGCGTTGGCTTCTCGCATCTAACGCTTAATCCACGTGCTTGAG |
| Barcode B-16     | CAAGCGTTGGCTTCTCGCATCTAAGACGGAATCCACGTGCTTGAG |
| Barcode B-17     | CAAGCGTTGGCTTCTCGCATCTAAGGTACAATCCACGTGCTTGAG |
| Barcode B-18     | CAAGCGTTGGCTTCTCGCATCTACACAGAAATCCACGTGCTTGAG |
| Barcode B-19     | CAAGCGTTGGCTTCTCGCATCTACAGCAGAATCCACGTGCTTGAG |
| Barcode B-20     | CAAGCGTTGGCTTCTCGCATCTACCTCAAATCCACGTGCTTGAG  |
| Barcode B-21     | CAAGCGTTGGCTTCTCGCATCTACGCTCGAATCCACGTGCTTGAG |
| Barcode B-22     | CAAGCGTTGGCTTCTCGCATCTACGTATCAATCCACGTGCTTGAG |
| Barcode B-23     | CAAGCGTTGGCTTCTCGCATCTACTATGCAATCCACGTGCTTGAG |
| Barcode B-24     | CAAGCGTTGGCTTCTCGCATCTAGAGTCAAATCCACGTGCTTGAG |
| Barcode B-25     | CAAGCGTTGGCTTCTCGCATCTAGATCGCAATCCACGTGCTTGAG |
| Barcode B-26     | CAAGCGTTGGCTTCTCGCATCTAGCAGGAAATCCACGTGCTTGAG |
| Barcode B-27     | CAAGCGTTGGCTTCTCGCATCTAGTCACTAATCCACGTGCTTGAG |
| Barcode B-28     | CAAGCGTTGGCTTCTCGCATCTATCCTGTAATCCACGTGCTTGAG |
| Barcode B-29     | CAAGCGTTGGCTTCTCGCATCTATTGAGGAATCCACGTGCTTGAG |
| Barcode B-30     | CAAGCGTTGGCTTCTCGCATCTCAACCACAATCCACGTGCTTGAG |
| Barcode B-31     | CAAGCGTTGGCTTCTCGCATCTGACTAGTAATCCACGTGCTTGAG |
| Barcode B-32     | CAAGCGTTGGCTTCTCGCATCTCAATGGAAATCCACGTGCTTGAG |
| Barcode B-33     | CAAGCGTTGGCTTCTCGCATCTCACTTCGAATCCACGTGCTTGAG |
| Barcode B-34     | CAAGCGTTGGCTTCTCGCATCTCAGCGTTAATCCACGTGCTTGAG |
| Barcode B-35     | CAAGCGTTGGCTTCTCGCATCTCATACCAAATCCACGTGCTTGAG |

|              |                                               |
|--------------|-----------------------------------------------|
| Barcode B-36 | CAAGCGTTGGCTTCTCGCATCTCCAGTTCAATCCACGTGCTTGAG |
| Barcode B-37 | CAAGCGTTGGCTTCTCGCATCTCCGAAGTAATCCACGTGCTTGAG |
| Barcode B-38 | CAAGCGTTGGCTTCTCGCATCTCCGTGAGAATCCACGTGCTTGAG |
| Barcode B-39 | CAAGCGTTGGCTTCTCGCATCTCCTCCTGAATCCACGTGCTTGAG |
| Barcode B-40 | CAAGCGTTGGCTTCTCGCATCTCGAACTTAATCCACGTGCTTGAG |
| Barcode B-41 | CAAGCGTTGGCTTCTCGCATCTCGACTGGAATCCACGTGCTTGAG |
| Barcode B-42 | CAAGCGTTGGCTTCTCGCATCTCGCATAAATCCACGTGCTTGAG  |
| Barcode B-43 | CAAGCGTTGGCTTCTCGCATCTCTCAATGAATCCACGTGCTTGAG |
| Barcode B-44 | CAAGCGTTGGCTTCTCGCATCTCTGAGCCAATCCACGTGCTTGAG |
| Barcode B-45 | CAAGCGTTGGCTTCTCGCATCTCTGGCATAATCCACGTGCTTGAG |
| Barcode B-46 | CAAGCGTTGGCTTCTCGCATCTGAATCTGAATCCACGTGCTTGAG |
| Barcode B-47 | CAAGCGTTGGCTTCTCGCATCTCAAGACTAATCCACGTGCTTGAG |
| Barcode B-48 | CAAGCGTTGGCTTCTCGCATCTGAGCTGAAATCCACGTGCTTGAG |
| Barcode B-49 | CAAGCGTTGGCTTCTCGCATCTGATAGACAATCCACGTGCTTGAG |
| Barcode B-50 | CAAGCGTTGGCTTCTCGCATCTGCCACATAATCCACGTGCTTGAG |
| Barcode B-51 | CAAGCGTTGGCTTCTCGCATCTGCGAGTAAATCCACGTGCTTGAG |
| Barcode B-52 | CAAGCGTTGGCTTCTCGCATCTGCTAACGAATCCACGTGCTTGAG |
| Barcode B-53 | CAAGCGTTGGCTTCTCGCATCTGCTCGGTAATCCACGTGCTTGAG |
| Barcode B-54 | CAAGCGTTGGCTTCTCGCATCTGGAGAACAATCCACGTGCTTGAG |
| Barcode B-55 | CAAGCGTTGGCTTCTCGCATCTGGTGCGAAATCCACGTGCTTGAG |
| Barcode B-56 | CAAGCGTTGGCTTCTCGCATCTGTACGCAAATCCACGTGCTTGAG |
| Barcode B-57 | CAAGCGTTGGCTTCTCGCATCTGTCGTAGAATCCACGTGCTTGAG |
| Barcode B-58 | CAAGCGTTGGCTTCTCGCATCTGTCTGTCAATCCACGTGCTTGAG |
| Barcode B-59 | CAAGCGTTGGCTTCTCGCATCTGTGTTCTAATCCACGTGCTTGAG |
| Barcode B-60 | CAAGCGTTGGCTTCTCGCATCTTAGGATGAATCCACGTGCTTGAG |
| Barcode B-61 | CAAGCGTTGGCTTCTCGCATCTTATCAGCAATCCACGTGCTTGAG |
| Barcode B-62 | CAAGCGTTGGCTTCTCGCATCTTCCGTCTAATCCACGTGCTTGAG |
| Barcode B-63 | CAAGCGTTGGCTTCTCGCATCTTCTTCACAATCCACGTGCTTGAG |
| Barcode B-64 | CAAGCGTTGGCTTCTCGCATCTTGAAGAGAATCCACGTGCTTGAG |
| Barcode B-65 | CAAGCGTTGGCTTCTCGCATCTTGGAAACAATCCACGTGCTTGAG |
| Barcode B-66 | CAAGCGTTGGCTTCTCGCATCTTGGCTTCAATCCACGTGCTTGAG |
| Barcode B-67 | CAAGCGTTGGCTTCTCGCATCTTGGTGGTAATCCACGTGCTTGAG |
| Barcode B-68 | CAAGCGTTGGCTTCTCGCATCTTTCACGCAATCCACGTGCTTGAG |
| Barcode B-69 | CAAGCGTTGGCTTCTCGCATCTAACTCACCATCCACGTGCTTGAG |
| Barcode B-70 | CAAGCGTTGGCTTCTCGCATCTAAGAGATCATCCACGTGCTTGAG |
| Barcode B-71 | CAAGCGTTGGCTTCTCGCATCTAAGGACACATCCACGTGCTTGAG |
| Barcode B-72 | CAAGCGTTGGCTTCTCGCATCTAATCCGTCATCCACGTGCTTGAG |

|               |                                               |
|---------------|-----------------------------------------------|
| Barcode B-73  | CAAGCGTTGGCTTCTCGCATCTAATGTTGCATCCACGTGCTTGAG |
| Barcode B-74  | CAAGCGTTGGCTTCTCGCATCTACACGACCATCCACGTGCTTGAG |
| Barcode B-75  | CAAGCGTTGGCTTCTCGCATCTACAGATTCATCCACGTGCTTGAG |
| Barcode B-76  | CAAGCGTTGGCTTCTCGCATCTAGATGTACATCCACGTGCTTGAG |
| Barcode B-77  | CAAGCGTTGGCTTCTCGCATCTAGCACCTCATCCACGTGCTTGAG |
| Barcode B-78  | CAAGCGTTGGCTTCTCGCATCTAGCCATGCATCCACGTGCTTGAG |
| Barcode B-79  | CAAGCGTTGGCTTCTCGCATCTAGGCTAACATCCACGTGCTTGAG |
| Barcode B-80  | CAAGCGTTGGCTTCTCGCATCTATAGCGACATCCACGTGCTTGAG |
| Barcode B-81  | CAAGCGTTGGCTTCTCGCATCTATCATTCCATCCACGTGCTTGAG |
| Barcode B-82  | CAAGCGTTGGCTTCTCGCATCTATTGGCTCATCCACGTGCTTGAG |
| Barcode B-83  | CAAGCGTTGGCTTCTCGCATCTCAAGGAGCATCCACGTGCTTGAG |
| Barcode B-84  | CAAGCGTTGGCTTCTCGCATCTCACCTTACATCCACGTGCTTGAG |
| Barcode B-85  | CAAGCGTTGGCTTCTCGCATCTCCATCCTCATCCACGTGCTTGAG |
| Barcode B-86  | CAAGCGTTGGCTTCTCGCATCTCCGACAACATCCACGTGCTTGAG |
| Barcode B-87  | CAAGCGTTGGCTTCTCGCATCTCCTAATCCATCCACGTGCTTGAG |
| Barcode B-88  | CAAGCGTTGGCTTCTCGCATCTCCTCTATCATCCACGTGCTTGAG |
| Barcode B-89  | CAAGCGTTGGCTTCTCGCATCTCGACACACATCCACGTGCTTGAG |
| Barcode B-90  | CAAGCGTTGGCTTCTCGCATCTCGGATTGCATCCACGTGCTTGAG |
| Barcode B-91  | CAAGCGTTGGCTTCTCGCATCTCTAAGGTCATCCACGTGCTTGAG |
| Barcode B-92  | CAAGCGTTGGCTTCTCGCATCTGAACAGGCATCCACGTGCTTGAG |
| Barcode B-93  | CAAGCGTTGGCTTCTCGCATCTGACAGTGCATCCACGTGCTTGAG |
| Barcode B-94  | CAAGCGTTGGCTTCTCGCATCTGAGTTAGCATCCACGTGCTTGAG |
| Barcode B-95  | CAAGCGTTGGCTTCTCGCATCTGATGAATCATCCACGTGCTTGAG |
| Barcode B-96  | CAAGCGTTGGCTTCTCGCATCTGCCAAGACATCCACGTGCTTGAG |
| Barcode B-97  | CAAGCGTTGGCTTCTCGCATCTCGGAAGAAATCCACGTGCTTGAG |
| Barcode B-98  | CAAGCGTTGGCTTCTCGCATCTGTGACAAGATCCACGTGCTTGAG |
| Barcode B-99  | CAAGCGTTGGCTTCTCGCATCTGAACCAGAATCCACGTGCTTGAG |
| Barcode B-100 | CAAGCGTTGGCTTCTCGCATCTTTGCTGGAATCCACGTGCTTGAG |

1  
2

1 **Extended Data Table 4. Mouse Universal cocktail applied in this study.**

| <b>DNA_ID</b> | <b>Name</b>                              | <b>Barcode sequence</b> |
|---------------|------------------------------------------|-------------------------|
| A0001         | anti-mouse CD4                           | AACAAGACCCTTGAG         |
| A0002         | anti-mouse CD8a                          | TACCCGTAATAGCGT         |
| A0003         | anti-mouse CD366 (Tim-3)                 | ATTGGCACTCAGATG         |
| A0004         | anti-mouse CD279 (PD-1)                  | GAAAGTCAAAGCACT         |
| A0013         | anti-mouse Ly-6C                         | AAGTCGTGAGGCATG         |
| A0014         | anti-mouse/human CD11b                   | TGAAGGCTCATTTGT         |
| A0015         | anti-mouse Ly-6G                         | ACATTGACGCAACTA         |
| A0070         | anti-human/mouse CD49f                   | TTCCGAGGATGATCT         |
| A0073         | anti-mouse/human CD44                    | TGGCTTCAGGTCCTA         |
| A0074         | anti-mouse CD54                          | ATAACCGACACAGTG         |
| A0075         | anti-mouse CD90.2                        | CCGATCAGCCGTTTA         |
| A0077         | anti-mouse CD73                          | ACACTTAACGTCTGG         |
| A0078         | anti-mouse CD49d                         | CGCTTGACGCTTAA          |
| A0079         | anti-mouse CD200 (OX2)                   | TCAATTCCGGTAGTC         |
| A0090         | Mouse IgG1, $\kappa$ isotype Ctrl        | GCCGGACGACATTAA         |
| A0091         | Mouse IgG2a, $\kappa$ isotype Ctrl       | CTCCTACCTAAACTG         |
| A0092         | Mouse IgG2b, $\kappa$ isotype Ctrl       | ATATGTATCACGCGA         |
| A0093         | anti-mouse CD19                          | ATCAGCCATGTCAGT         |
| A0095         | Rat IgG2b, $\kappa$ Isotype Ctrl         | GATTCTTGACGACCT         |
| A0096         | anti-mouse CD45                          | TGGCTATGGAGCAGA         |
| A0097         | anti-mouse CD25                          | ACCATGAGACACAGT         |
| A0103         | anti-mouse/human CD45R/B220              | CCTACACCTCATAAT         |
| A0104         | anti-mouse CD102                         | GATATTCAGTGCGAC         |
| A0105         | anti-mouse CD115 (CSF-1R)                | TTCCGTTGTTGTGAG         |
| A0106         | anti-mouse CD11c                         | GTTATGGACGCTTGC         |
| A0107         | anti-mouse CD21/CD35 (CR2/CR1)           | GGATAATTTTCGATCC        |
| A0108         | anti-mouse CD23                          | TCTCTTGGAAGATGA         |
| A0110         | anti-mouse CD43                          | TTGGAGGGTTGTGCT         |
| A0111         | anti-mouse CD5                           | CAGCTCAGTGTGTTG         |
| A0112         | anti-mouse CD62L                         | TGGGCCTAAGTCATC         |
| A0113         | anti-mouse CD93 (AA4.1, early B lineage) | GGTATTTCTGTGGT          |
| A0114         | anti-mouse F4/80                         | TAACTTCAGCCCGT          |
| A0115         | anti-mouse Fc $\epsilon$ RI $\alpha$     | AGTCACCTCGAAGCT         |
| A0117         | anti-mouse I-A/I-E                       | GGTCACCAGTATGAT         |

|       |                                     |                  |
|-------|-------------------------------------|------------------|
| A0118 | anti-mouse NK-1.1                   | GTAACATTACTCGTC  |
| A0119 | anti-mouse Siglec H                 | CCGCACCTACATTAG  |
| A0120 | anti-mouse TCR $\beta$ chain        | TCCTATGGGACTCAG  |
| A0121 | anti-mouse TCR $\gamma/\delta$      | AACCCAAATAGCTGA  |
| A0122 | anti-mouse TER-119/Erythroid Cells  | GCGCGTTTGTGCTAT  |
| A0130 | anti-mouse Ly-6A/E (Sca-1)          | TTCCTTTCCTACGCA  |
| A0157 | anti-mouse CD45.2                   | CACCGTCATTCAACC  |
| A0182 | anti-mouse CD3                      | GTATGTCCGCTCGAT  |
| A0190 | anti-mouse CD274 (B7-H1, PD-L1)     | TCGATTCCACCAACT  |
| A0191 | anti-mouse/rat/human CD27           | CAAGGTATGTCACTG  |
| A0192 | anti-mouse CD20                     | TCCACTCCCTGTATA  |
| A0193 | anti-mouse CD357 (GITR)             | GGCACTCTGTAACAT  |
| A0194 | anti-mouse CD137                    | TCCCTGTATAGATGA  |
| A0195 | anti-mouse CD134 (OX-40)            | CTCACCTACCTATGG  |
| A0197 | anti-mouse CD69                     | TTGTATTCCGCCATT  |
| A0198 | anti-mouse CD127 (IL-7R $\alpha$ )  | GTGTGAGGCACTCTT  |
| A0200 | anti-mouse CD86                     | CTGGATTTGTGTATC  |
| A0201 | anti-mouse CD103                    | TTCATTAGCCCGCTG  |
| A0202 | anti-mouse CD64 (Fc $\gamma$ RI)    | AGCAATTAACGGGAG  |
| A0203 | anti-mouse CD150 (SLAM)             | CAACGCCTAGAAACC  |
| A0212 | anti-mouse CD24                     | TATATCTTTGCCGCA  |
| A0214 | anti-human/mouse integrin $\beta$ 7 | TCCTTGGATGTACCG  |
| A0226 | anti-mouse CD106                    | CGTTCCTACCTACCT  |
| A0230 | anti-mouse CD8b (Ly-3)              | TTCCCTCTATGGAGC  |
| A0236 | Rat IgG1, $\kappa$ isotype Ctrl     | ATCAGATGCCCTCAT  |
| A0237 | Rat IgG1, $\lambda$ Isotype Ctrl    | GGGAGCGATTCAACT  |
| A0238 | Rat IgG2a, $\kappa$ Isotype Ctrl    | AAGTCAGGTTTCGTTT |
| A0240 | Rat IgG2c, $\kappa$ Isotype Ctrl    | TCCAGGCTAGTCATT  |
| A0241 | Armenian Hamster IgG Isotype Ctrl   | CCTGTCATTAAGACT  |
| A0250 | anti-mouse/human KLRG1 (MAFA)       | GTAGTAGGCTAGACC  |
| A0378 | anti-mouse CD223 (LAG-3)            | ATTCCGTCCCTAAGG  |
| A0417 | anti-mouse CD163                    | GAGCAAGATTAAGAC  |
| A0421 | anti-mouse CD49b                    | CGCGTTAGTAGAGTC  |
| A0422 | anti-mouse CD172a (SIRP $\alpha$ )  | GATTCCCTTGTAGCA  |
| A0429 | anti-mouse CD48                     | AGAACCGCCGTAGTT  |
| A0431 | anti-mouse CD170 (Siglec-F)         | TCAATCTCCGTCGCT  |
| A0440 | anti-mouse CD169/Siglec-1           | ATTGACGACAGTCAT  |



|       |                                          |                 |
|-------|------------------------------------------|-----------------|
| A0441 | anti-mouse CD71                          | ACCGACCAGTAGACA |
| A0443 | anti-mouse CD41                          | ACTTGGATGGACACT |
| A0450 | anti-mouse IgM                           | AGCTACGCATTCAAT |
| A0551 | anti-mouse CD301a                        | TGTATTTACTCACCG |
| A0552 | anti-mouse CD304 (Neuropilin-1)          | CCAGCTCATTCAACG |
| A0555 | anti-mouse CD36                          | TTTGCCGCTACGACA |
| A0557 | anti-mouse CD38                          | CGTATCCGTCTCCTA |
| A0558 | anti-mouse CD55 (DAF)                    | ATTGTTGTCAGACCA |
| A0559 | anti-mouse CD63                          | ATCCGACACGTATTA |
| A0560 | anti-mouse CD68                          | CTTTCTTTACGCGGA |
| A0561 | anti-mouse CD79b (Ig $\beta$ )           | TAACTCAGTGCGAGT |
| A0562 | anti-mouse CD83                          | TCTCAGGCTTCCTAG |
| A0563 | anti-mouse CX3CR1                        | CACTCTCAGTCCTAT |
| A0566 | anti-mouse CD301b                        | CTTGCCTTGCGATTT |
| A0567 | anti-mouse Tim-4                         | TGCTGGAGGGTATTC |
| A0568 | anti-mouse/rat XCR1                      | TCCATTACCCACGTT |
| A0570 | anti-mouse/rat CD29                      | ACGCATTCCTTGTGT |
| A0571 | anti-mouse IgD                           | TCATATCCGTTGTCC |
| A0595 | anti-mouse CD11a                         | AGAGTCTCCCTTtag |
| A0807 | anti-mouse CD200R (OX2R)                 | ATTCTTTCCCTCTGT |
| A0809 | anti-mouse CD200R3                       | ATCAACTTGGAGCAG |
| A0810 | anti-mouse CD138 (Syndecan-1)            | GCGTTTGTATGTACT |
| A0811 | anti-mouse CD317 (BST2, PDCA-1)          | TGTGGTAGCCCTTGT |
| A0813 | anti-mouse CD9                           | TAGCAGTCACTCCTA |
| A0825 | anti-mouse CD371 (CLEC12A)               | GCGAGAAATCTGCAT |
| A0827 | anti-mouse CD22                          | AGGTCCTCTCTGGAT |
| A0837 | anti-mouse IL-33R $\alpha$ (IL1RL1, ST2) | GCGATGGAGCATGTT |
| A0839 | anti-mouse Ly49H                         | CCAGTAGGCTTATTA |
| A0841 | anti-mouse Ly49D                         | TATATCCCTCAACGC |
| A0842 | anti-mouse Ly-49A                        | AATTCCGTCAGATGA |
| A0846 | anti-mouse CD185 (CXCR5)                 | ACGTAGTCACCTAGT |
| A0850 | anti-mouse CD49a                         | CCATTCATTTGTGGC |
| A0851 | anti-mouse CD1d (CD1.1, Ly-38)           | CAACTTGGCCGAATC |
| A0852 | anti-mouse CD226 (DNAM-1)                | ACGCAGTATTTCCGA |
| A0854 | anti-mouse CD199 (CCR9)                  | CCCTCTGGTATGGTT |
| A0877 | anti-mouse JAML                          | GTTATGGTTCGTGTT |
| A0881 | anti-mouse CD272 (BTLA)                  | TGACCCTATTGAGAA |

|       |                                       |                  |
|-------|---------------------------------------|------------------|
| A0882 | anti-mouse PIR-A/B                    | TGTAGAGTCAGACCT  |
| A0883 | anti-mouse CD26 (DPP-4)               | ATGGCCTGTCATAAT  |
| A0885 | anti-mouse CD270 (HVEM)               | GATCCGTGTTGCCTA  |
| A0892 | anti-mouse CD2                        | TTGCCGTGTGTTTAA  |
| A0893 | anti-mouse CD120b (TNF R Type II/p75) | GAAGCTGTATCCGAA  |
| A0903 | anti-mouse CD40                       | ATTTGTATGCTGGAG  |
| A0904 | anti-mouse CD31                       | GCTGTAGTATCATGT  |
| A0905 | anti-mouse CD107a (LAMP-1)            | AAATCTGTGCCGTAC  |
| A0910 | anti-mouse/rat CD61                   | TTCTTTACCCGCCTG  |
| A0915 | anti-mouse VISTA (PD-1H)              | ACATTTCCCTTGCCT  |
| A0926 | anti-mouse CD186 (CXCR6)              | TGTCAGGTTGTATTC  |
| A0927 | anti-mouse CD159a (NKG2AB6)           | GTGTTTGTGTTCCCTG |
| A0930 | anti-mouse Ly108                      | CGATTCTTTGCGAGT  |
| A1006 | anti-mouse CD160                      | GCGTATGTCAGTACC  |
| A1007 | anti-mouse CD85k (gp49 Receptor)      | ATGTCAACTCTGGGA  |
| A1008 | anti-mouse CD51                       | GGAGTCAGGGTATTA  |
| A1009 | anti-mouse CD94                       | CACAGTTGTCCGTGT  |
| A1010 | anti-mouse CD205 (DEC-205)            | CATATTGGCCGTAGT  |
| A1011 | anti-mouse CD155 (PVR)                | TAGCTTGGGATTAAG  |
| A1064 | anti-mouse/rat CD81                   | TTGTCACCAACTTCC  |
|       | MBP                                   | TAGTACGGATCCAGT  |
|       | MOG                                   | GGTACTGAACTTTAG  |
|       | NEUN                                  | CGAGTGCACCTTGAG  |
|       | PDGFR $\alpha$                        | CTTGATCGTTGACGA  |
|       | SATB2                                 | GACAAATTGTCAGTT  |
|       | TBR1                                  | AATCGAATTGGCATA  |
|       | CUX2/1                                | AAACTAAGATGACGG  |
|       | CTIP2                                 | TTAAGATCAGGAATC  |

1  
2

1 **Extended Data Table 5. Human Universal cocktail applied in this study.**

| <b>ID</b> | <b>Name</b>      | <b>Barcode sequence</b> |
|-----------|------------------|-------------------------|
| ADT_A0006 | Hu.CD86          | GTCTTTGTCAGTGCA         |
| ADT_A0007 | Hu.CD274         | GTTGTCCGACAATAC         |
| ADT_A0020 | Hu.CD270         | TGATAGAAACAGACC         |
| ADT_A0023 | Hu.CD155         | ATCACATCGTTGCCA         |
| ADT_A0024 | Hu.CD112         | AACCTTCCGTCTAAG         |
| ADT_A0026 | Hu.CD47          | GCATTCTGTCACCTA         |
| ADT_A0029 | Hu.CD48          | CTACGACGTAGAAGA         |
| ADT_A0031 | Hu.CD40          | CTCAGATGGAGTATG         |
| ADT_A0032 | Hu.CD154         | GCTAGATAGATGCAA         |
| ADT_A0033 | Hu.CD52          | CTTTGTACGAGCAA          |
| ADT_A0034 | Hu.CD3_UCHT1     | CTCATTGTAACCTCCT        |
| ADT_A0046 | Hu.CD8           | GCGCAACTTGATGAT         |
| ADT_A0047 | Hu.CD56          | TCCTTTCCTGATAGG         |
| ADT_A0050 | Hu.CD19          | CTGGGCAATTACTCG         |
| ADT_A0052 | Hu.CD33          | TAACTCAGGGCCTAT         |
| ADT_A0053 | Hu.CD11c         | TACGCCTATAACTTG         |
| ADT_A0058 | Hu.HLA.ABC       | TATGCGAGGCTTATC         |
| ADT_A0063 | Hu.CD45RA        | TCAATCCTTCCGCTT         |
| ADT_A0064 | Hu.CD123         | CTTCACTCTGTCAGG         |
| ADT_A0066 | Hu.CD7           | TGGATTCCCGGACTT         |
| ADT_A0070 | HuMs.CD49f       | TTCCGAGGATGATCT         |
| ADT_A0071 | Hu.CD194         | AGCTTACCTGCACGA         |
| ADT_A0072 | Hu.CD4_RPA.T4    | TGTTCCCGCTCAACT         |
| ADT_A0073 | HuMs.CD44        | TGGCTTCAGGTCCTA         |
| ADT_A0081 | Hu.CD14_M5E2     | TCTCAGACCTCCGTA         |
| ADT_A0083 | Hu.CD16          | AAGTTCACTCTTTGC         |
| ADT_A0085 | Hu.CD25          | TTTGTCCTGTACGCC         |
| ADT_A0087 | Hu.CD45RO        | CTCCGAATCATGTTG         |
| ADT_A0088 | Hu.CD279         | ACAGCGCCGTATTTA         |
| ADT_A0089 | Hu.TIGIT         | TTGCTTACCGCCAGA         |
| ADT_A0090 | Isotype_MOPC.21  | GCCGGACGACATTAA         |
| ADT_A0091 | Isotype_MOPC.173 | CTCCTACCTAAACTG         |
| ADT_A0092 | Isotype_MPC.11   | ATATGTATCACGCGA         |
| ADT_A0095 | Isotype_RTK4530  | GATTCTTGACGACCT         |
| ADT_A0100 | Hu.CD20_2H7      | TTCTGGGTCCCTAGA         |

|           |                 |                  |
|-----------|-----------------|------------------|
| ADT_A0101 | Hu.CD335        | ACAATTTGAACAGCG  |
| ADT_A0124 | Hu.CD31         | ACCTTTATGCCACGG  |
| ADT_A0127 | Hu.Podoplanin   | GGTACTCGTTGTGT   |
| ADT_A0134 | Hu.CD146        | CCTTGGATAACATCA  |
| ADT_A0136 | Hu.IgM          | TAGCGAGCCCGTATA  |
| ADT_A0138 | Hu.CD5          | CATTAACGGGATGCC  |
| ADT_A0140 | Hu.CD183        | GCGATGGTAGATTAT  |
| ADT_A0141 | Hu.CD195        | CCAAAGTAAGAGCCA  |
| ADT_A0142 | Hu.CD32         | GCTTCCGAATTACCG  |
| ADT_A0143 | Hu.CD196        | GATCCCTTTGTCCT   |
| ADT_A0144 | Hu.CD185        | AATTCAACCGTCGCC  |
| ADT_A0145 | Hu.CD103        | GACCTCATTGTGAAT  |
| ADT_A0146 | Hu.CD69         | GTCTCTTGGCTTAAA  |
| ADT_A0147 | Hu.CD62L        | GTCCCTGCAACTTGA  |
| ADT_A0149 | Hu.CD161        | GTACGCAGTCCTTCT  |
| ADT_A0151 | Hu.CD152        | ATGGTTCACGTAATC  |
| ADT_A0152 | Hu.CD223        | CATTGTCTGCCGGT   |
| ADT_A0153 | Hu.KLRG1        | CTTATTTCTGCCCCT  |
| ADT_A0154 | Hu.CD27         | GCACTCCTGCATGTA  |
| ADT_A0155 | Hu.CD107a       | CAGCCCCTGCAATA   |
| ADT_A0156 | Hu.CD95         | CCAGCTCATTAGAGC  |
| ADT_A0158 | Hu.CD134        | AACCCACCGTTGTTA  |
| ADT_A0159 | Hu.HLA.DR       | AATAGCGAGCAAGTA  |
| ADT_A0160 | Hu.CD1c         | GAGCTACTTCACTCG  |
| ADT_A0161 | Hu.CD11b        | GACAAGTGATCTGCA  |
| ADT_A0162 | Hu.CD64         | AAGTATGCCCTACGA  |
| ADT_A0163 | Hu.CD141        | GGATAACCGCGCTTT  |
| ADT_A0165 | Hu.CD314        | CGTGTTTGTTCCTCA  |
| ADT_A0167 | Hu.CD35         | ACTCCGTCGATCTT   |
| ADT_A0168 | Hu.CD57         | AACTCCCTATGGAGG  |
| ADT_A0170 | Hu.CD272        | GTTATTGGACTAAGG  |
| ADT_A0171 | HuMsRt.CD278    | CGCGCACCCATTAATA |
| ADT_A0172 | Hu.CD275_B7.RP1 | GTTAGTGTTAGCTTG  |
| ADT_A0174 | Hu.CD58         | GTTCCCTATGGACGAC |
| ADT_A0176 | Hu.CD39         | TTACCTGGTATCCGT  |
| ADT_A0179 | Hu.CX3CR1       | AGTATCGTCTCTGGG  |
| ADT_A0180 | Hu.CD24         | AGATTCCTTCGTGTT  |

|           |                  |                  |
|-----------|------------------|------------------|
| ADT_A0181 | Hu.CD21          | AACCTAGTAGTTCGG  |
| ADT_A0185 | Hu.CD11a         | TATATCCTTGTGAGC  |
| ADT_A0187 | Hu.CD79b         | ATTCTTCAACCGAAG  |
| ADT_A0189 | Hu.CD244         | TCGCTTGGATGGTAG  |
| ADT_A0206 | Hu.CD169         | TACTCAGCGTGTTTG  |
| ADT_A0214 | HuMs.integrin.b7 | TCCTTGGATGTACCG  |
| ADT_A0215 | Hu.CD268         | CGAAGTCGATCCGTA  |
| ADT_A0216 | Hu.CD42b         | TCCTAGTACCGAAGT  |
| ADT_A0217 | Hu.CD54          | CTGATAGACTTGAGT  |
| ADT_A0218 | Hu.CD62P         | CCTTCCGTATCCCTT  |
| ADT_A0219 | Hu.CD119         | TGTGTATTCCCTTGT  |
| ADT_A0224 | Hu.TCR.AB        | CGTAACGTAGAGCGA  |
| ADT_A0236 | Isotype_RTK2071  | ATCAGATGCCCTCAT  |
| ADT_A0237 | Isotype_G0114F7  | GGGAGCGATTCAACT  |
| ADT_A0238 | Isotype_RTK2758  | AAGTCAGGTTTCGTTT |
| ADT_A0240 | Isotype_RTK4174  | TCCAGGCTAGTCATT  |
| ADT_A0241 | Isotype_HTK888   | CCTGTCATTAAGACT  |
| ADT_A0242 | Hu.CD192         | GAGTTCCTTACCTG   |
| ADT_A0246 | Hu.CD122         | TCATTTCCCTCCGATT |
| ADT_A0247 | Hu.CD267         | AGTGATGGAGCGAAC  |
| ADT_A0352 | Hu.FcεRIα        | CTCGTTTCCGTATCG  |
| ADT_A0353 | Hu.CD41          | ACGTTGTGGCCTTGT  |
| ADT_A0355 | Hu.CD137         | CAGTAAGTTCGGGAC  |
| ADT_A0357 | Hu.CD43          | GATTAACCAGCTCAT  |
| ADT_A0358 | Hu.CD163         | GCTTCTCCTTCTTA   |
| ADT_A0359 | Hu.CD83          | CCACTCATTTCGGGT  |
| ADT_A0364 | Hu.CD13          | TTTCAACGCCCTTTC  |
| ADT_A0367 | Hu.CD2           | TACGATTTGTCAGGG  |
| ADT_A0368 | Hu.CD226_11A8    | TCTCAGTGTTTGTGG  |
| ADT_A0369 | Hu.CD29          | GTATTCCTCAGTCA   |
| ADT_A0370 | Hu.CD303         | GAGATGTCCGAATTT  |
| ADT_A0371 | Hu.CD49b         | GCTTTCTTCAGTATG  |
| ADT_A0372 | Hu.CD61          | AGGTTGGAGTAGACT  |
| ADT_A0373 | Hu.CD81          | GTATCCTTCCTTGGC  |
| ADT_A0383 | Hu.CD55          | GCTCATTACCCATTA  |
| ADT_A0384 | Hu.IgD           | CAGTCTCCGTAGAGT  |
| ADT_A0385 | Hu.CD18          | TATTGGGACACTTCT  |

|           |                |                 |
|-----------|----------------|-----------------|
| ADT_A0386 | Hu.CD28        | TGAGAACGACCCTAA |
| ADT_A0389 | Hu.CD38_HIT2   | TGTACCCGCTTGTGA |
| ADT_A0390 | Hu.CD127       | GTGTGTTGTCCTATG |
| ADT_A0391 | Hu.CD45_HI30   | TGCAATTACCCGGAT |
| ADT_A0393 | Hu.CD22        | GGGTTGTTGTCTTTG |
| ADT_A0394 | Hu.CD71        | CCGTGTTCCCTCATT |
| ADT_A0396 | Hu.CD26        | GGTGGCTAGATAATG |
| ADT_A0398 | Hu.CD115       | AATCACGGTCCTTGT |
| ADT_A0404 | Hu.CD63        | GAGATGTCTGCAACT |
| ADT_A0406 | Hu.CD304       | GGACTAAGTTTCGTT |
| ADT_A0407 | Hu.CD36        | TTCTTTGCCTTGCCA |
| ADT_A0408 | Hu.CD172a      | CGTGTTTAACTTGAG |
| ADT_A0419 | Hu.CD72        | CAGTCGTGGTAGATA |
| ADT_A0420 | Hu.CD158       | TATCAACCAACGCTT |
| ADT_A0446 | Hu.CD93        | GCGCTACTTCCTTGA |
| ADT_A0447 | Hu.CD200       | CACGTAGACCTTTGC |
| ADT_A0575 | Hu.CD49a       | ACTGATGGACTCAGA |
| ADT_A0576 | Hu.CD49d       | CCATTCAACTTCCGG |
| ADT_A0577 | Hu.CD73        | CAGTTCCTCAGTTCG |
| ADT_A0579 | Hu.CD9         | GAGTCACCAATCTGC |
| ADT_A0581 | Hu.TCR.Va7.2   | TACGAGCAGTATTCA |
| ADT_A0582 | Hu.TCR.Vd2     | TCAGTCAGATGGTAT |
| ADT_A0586 | Hu.CD354       | TAGCCGTTTCCTTTG |
| ADT_A0590 | Hu.CD305_LAIR1 | ATTTCCATTCCCTGT |
| ADT_A0591 | Hu.LOX.1       | ACCCTTTACCGAATA |
| ADT_A0599 | Hu.CD158e1     | GGACGCTTTCCTTGA |
| ADT_A0817 | Hu.CD109       | CACTTAACTCTGGGT |
| ADT_A0822 | Hu.CD142       | CACTGCCGTCGATTA |
| ADT_A0830 | Hu.CD319       | AGTATGCCATGTCTT |
| ADT_A0845 | Hu.CD99        | ACCCGTCCCTAAGAA |
| ADT_A0853 | Hu.CLEC12A     | CATTAGAGTCTGCCA |
| ADT_A0861 | Hu.CD151       | CTTACCTAGTCATTC |
| ADT_A0864 | Hu.CD352       | AGTTTCCACTCAGGC |
| ADT_A0866 | Hu.CLEC1B      | TGCCAGTATCACGTA |
| ADT_A0867 | Hu.CD94        | CTTCCGGTCCTACA  |
| ADT_A0868 | Hu.IgE         | GGATGTACCGCGTAT |
| ADT_A0870 | Hu.CD150       | GTCATTGTATGTCTG |

|           |                    |                 |
|-----------|--------------------|-----------------|
| ADT_A0871 | Hu.CD162           | ATATGTCAGAGCACC |
| ADT_A0872 | Hu.CD84            | CTCCCTAGTTCCTTT |
| ADT_A0894 | Hu.Ig.LightChain.k | AGCTCAGCCAGTATG |
| ADT_A0896 | Hu.CD85j           | CCTTGTGAGGCTATG |
| ADT_A0897 | Hu.CD23            | TCTGTATAACCGTCT |
| ADT_A0898 | Hu.Ig.LightChain.l | CAGCCAGTAAGTCAC |
| ADT_A0902 | Hu.CD328           | CTTAGCATTTCCTG  |
| ADT_A0912 | Hu.GPR56           | GCCTAGTTTCCGTTT |
| ADT_A0920 | Hu.CD82            | TCCCACTTCCGCTTT |
| ADT_A0923 | Hu.NKp80           | TATAGTTCCTCTGTG |
| ADT_A0931 | Hu.CD131           | CTGCATGAGACCAAA |
| ADT_A0935 | Hu.CD74            | CTGTAGCATTTCCT  |
| ADT_A0940 | Hu.CD116           | ATGGACAGTTCGTGT |
| ADT_A0941 | Hu.CD37            | ACAGTCACTGGGCAA |
| ADT_A0944 | Hu.CD101           | CTACTTCCCTGTCAA |
| ADT_A1018 | Hu.HLA.DR.DP.DQ    | AGCTACGAGCAGTAG |
| ADT_A1046 | Hu.CD88            | GCCGCATGAGAAACA |

1

2

1 **Extended Data Table 6. Chemicals and reagents.**

| <b>Name</b>                                        | <b>Catalog number</b> | <b>Vender</b>                |
|----------------------------------------------------|-----------------------|------------------------------|
| Formaldehyde solution                              | PI28906               | Thermo Fisher Scientific     |
| HEPES pH 7.5                                       | BBH-75-250            | Boston BioProducts           |
| Glycine                                            | 50046                 | Sigma-Aldrich                |
| NaCl                                               | AM9760G               | Thermo Fisher Scientific     |
| Digitonin                                          | G9441                 | Promega                      |
| MgCl <sub>2</sub>                                  | AM9530G               | Thermo Fisher Scientific     |
| Spermidine                                         | S0266                 | Sigma-Aldrich                |
| EDTA-free Protease Inhibitor<br>Cocktail           | 11873580001           | Millipore Sigma              |
| NP40                                               | 11332473001           | Sigma-Aldrich                |
| EDTA Solution pH 8.0                               | AB00502               | AmericanBio                  |
| Bovine Serum Albumin (BSA)                         | A8806                 | Sigma-Aldrich                |
| Anti-H3K27me3 antibody                             | 9733                  | Cell Signaling<br>Technology |
| Secondary antibody (Guinea Pig<br>anti-Rabbit IgG) | ABIN101961            | Antibodies-Online            |
| pA-Tn5 Transposase – unloaded                      | C01070002             | Diagenode                    |
| Triton X-100                                       | T8787                 | Sigma-Aldrich                |
| T4 DNA Ligase                                      | M0202L                | New England Biolabs          |
| T4 DNA Ligase Reaction Buffer                      | B0202S                | New England Biolabs          |
| NEBuffer 3.1                                       | B7203S                | New England Biolabs          |
| DPBS                                               | 14190144              | Thermo Fisher Scientific     |
| Proteinase K                                       | EO0491                | Thermo Fisher Scientific     |
| Ampure XP beads                                    | A63880                | Beckman Coulter              |
| NEBNext High-Fidelity 2X PCR<br>Master Mix         | M0541L                | New England Biolabs          |
| SYBR Green I Nucleic Acid Gel<br>Stain             | S7563                 | Thermo Fisher Scientific     |
| DNA Clean & Concentrator-5                         | D4014                 | Zymo Research                |
| Tn5 Transposase - unloaded                         | C01070010             | Diagenode                    |
| Tagmentation Buffer (2x)                           | C01019043             | Diagenode                    |
| Sodium dodecyl sulfate                             | 71736                 | Sigma-Aldrich                |
| Maxima H Minus Reverse<br>Transcriptase (200 U/L)  | EP0751                | Thermo Fisher Scientific     |
| dNTP mix                                           | R0192                 | Thermo Fisher Scientific     |
| SUPERased In RNase Inhibitor                       | AM2694                | Thermo Fisher Scientific     |



|                                |             |                          |
|--------------------------------|-------------|--------------------------|
| Ampure XP beads                | A63880      | Beckman Coulter          |
| Dynabeads MyOne C1             | 65001       | Thermo Fisher Scientific |
| RNase Inhibitor                | Y9240L      | Enzymatics               |
| Kapa Hotstart HiFi ReadyMix    | KK2601      | Kapa Biosystems          |
| Nextera XT DNA Preparation Kit | FC-131-1024 | Illumina                 |
| PDGFR $\alpha$                 | ab234965    | abcam                    |
| OLIG2                          | ab220796    | abcam                    |
| APC                            | ab239828    | abcam                    |
| MBP                            | ab230378    | abcam                    |
| IBA1                           | ab220815    | abcam                    |
| GFAP                           | ab218309    | abcam                    |
| CTIP2                          | ab269367    | abcam                    |
| CUX1+Cux2                      | ab309140    | abcam                    |
| TBR1                           | ab239000    | abcam                    |
| NeuN                           | ab209898    | abcam                    |
| MOG                            | ab255266    | abcam                    |
| Satb2                          | ab212177    | abcam                    |
| CD31                           | 4250001     | Akoya                    |
| CD4                            | 4250016     | Akoya                    |
| CD8a                           | 4250017     | Akoya                    |
| CD19                           | 4250014     | Akoya                    |
| CD45R/B220                     | 4450006     | Akoya                    |
| CD11c                          | 4550108     | Akoya                    |
| Ki67                           | 4250019     | Akoya                    |
| CD11b                          | 4450015     | Akoya                    |
| Ly6g                           | 4550110     | Akoya                    |
| CD3                            | 4550109     | Akoya                    |
| CD169                          | 4550100     | Akoya                    |
| Mouse Universal Cocktail       | 199901      | BioLegend                |
| Human Universal Cocktail       | 399907      | BioLegend                |

1  
2

- 1 **Extended Data Table 7.** The gene list of each cluster generated from the regression model for
- 2 mouse brain cortical layers.
- 3 **Extended Data Table 8.** The gene list of each cluster generated from the regression model for
- 4 mouse brain corpus callosum.
- 5 **Extended Data Video 1.** Video output from TRIC-DISCO, replicate #1.
- 6 **Extended Data Video 2.** Video output from TRIC-DISCO, replicate #2.
- 7 **Extended Data Video 3.** Video output from TRIC-DISCO, replicate #3.
- 8
